# Supplementary material for: Identifying priority ecosystem services in tidal wetland restoration
Source: Frontiers journal article supplement (doi:10.3389/fevo.2024.1260447), 2024-07-08
Supplement: Data_Sheet_3.xlsx [file Data_Sheet_3.xlsx]

## Sheet: Table of Contents
Caption	Full list of keywords used to flag paragraphs for beneficiaries, environment types, and ecological end products.
Category	The three components of an ecosystem services triplet.
Class	These classes are derived from NESCS Plus and the National Wetland Inventory.
Subclass	These subclasses are derived from NESCS Plus, the FEGS Scoping Tool, and the National Wetland Inventory.
Word_type	Each subclass has associated keywords that are searched for, depending on the type of word. "Include" are words that must be included in a sentence for it to be flagged. "Near" words (i.e., companion words) must also be included in the sentence and modify the 'include' words in some way. "Exclude" words cause the flagged sentence to be rejected.
S1-S12	These are sets of keywords that are searched (depending on the word type) to flag sentences in the document search. The symbol "|" indicates "OR". Within a column for a given subclass, particular "near", "include", and "exclude" words are considered in combination. Different columns (S1, S2, etc.) may represent other keyword combinations that are also considered (i.e., the sentence is flagged if …

## Sheet: Keywords
Category	Class	Subclass	Word_type	S1	S2	S3	S4	S5	S6	S7	S8	S9	S10	S11	S12
Beneficiary	Beneficiary	Unknown Beneficiary	include	resource|mitigat|economic use|economic opportunity|economic opportunities|bounty|bountiful|benefit|social value|economic value|valuable	beneficial use|living resource|natural feature|natural resource|ecosystem service|ecological service|water resource|air resource|ecological resource|valuable resource|resource value|land use|aquatic use|water use|water dependent use|public access	clean air|clean water|air quality|water quality	water dependent activit|water related activit
Beneficiary	Beneficiary	Unknown Beneficiary	exclude	Department|sewer service|office|division|commission|bay scallop|lander|landing|landmark|southland|parking|parker|economical|protection agency|environmentally|temperature value|biomass value|the regional|provid.* no clue|provid.* notice|provid.* basis|provid.*expertise|valuable tool|water fowl	department	recreational water quality|drinking water quality|clean water act|clean air act
Beneficiary	Beneficiary	Unknown Beneficiary	near	ecosystem|environment|natur|estuar|renewable| bay |ecological|field|aquatic|marine|water|park|coast|shore| land |wetland|the reserve|floodplain|biological|basin|region| area|watershed
Beneficiary	Agricultural	Agricultural	include	Agricultur	fertilizer|pesticide|fungicide|herbicide|insecticide
Beneficiary	Agricultural	Agricultural	exclude	department.*agricultur|division.*agricultur|non-agricultural|agricultural services office
Beneficiary	Agricultural	Livestock Grazers	include	ranch|grazing|cattle.*range|graze|movement	pasture	ranching
Beneficiary	Agricultural	Livestock Grazers	exclude	branch|actions|escuela|fennessey|rush.*ranch|quahog|pigment|pigeon|pathogen|hog hammock|sheepshead|duck harbor|duck creek|swan street|ducks unlimited		branch|rush.*ranch
Beneficiary	Agricultural	Livestock Grazers	near	livestock|cattle|hog|poultry|cow|pig|sheep|goat|duck
Beneficiary	Agricultural	Agricultural Processors	include	processor|processing|production|products	mill	commodity|commodities|goods
Beneficiary	Agricultural	Agricultural Processors	near	agricultur|agro|farm|food|grain|meat|sugar|grain|vegetable|fruit	agricult|farm|grain|food	agricult|farm
Beneficiary	Agricultural	Agricultural Processors	exclude	seafood|oyster|shellfish|fish|in the process|reproduct|timeat|primary.*product|DOM product|grain size|sediment.* grain|grain.*sediment|processing time|oystercatcher	million|millimeter|millennia|milliliter|millirem|milligram|miller|mill.*creek|mill pond|millet|grain size|sediment.* grain|grain.*sediment
Beneficiary	Agricultural	Aquaculturists	include	aquacultur|aquafarm|shellfish garden|oyster garden|shellfish farm|oyster farm|fish farm|aqua-farm|aquatic farm	hatchery|hatcheries|culturing|grower|culture|cultivat|garden	hatchery|hatcheries|culturing|grower|growing|culture|cultivat
Beneficiary	Agricultural	Aquaculturists	near		shellfish| fish |oyster|scallop|mussel|shrimp|aquatic.*plant|meat|crab|salmon|oyster|crab|lobster|mullet|mussel|bass|herring|flounder|scallop| clam |geoduck|crawfish|crayfish|crustacea	aqua
Beneficiary	Agricultural	Aquaculturists	exclude		fishing|fisher|agricultur|ambassador|spike|native culture|cultures|herring river|herring creek|bass river|herring cove|duck harbor|duck creek|swan street|timeat|salmonberry|herring gull|salmon creek|salmon highway|salmon drift watershed council|salmon river|oystercatcher	fishing|fisher|agricultur|ambassador|spike|native culture|cultures
Beneficiary	Agricultural	Farmers	include	crops|orchard|farm|cropland|crop nutrient	bog|farm|harvest|grower|growing
Beneficiary	Agricultural	Farmers	exclude	farm shellfish|farm fish|farm oyster|farm clam|farm mussel|farm shrimp|farm shellfish|farmed fish|farmed oyster|farmed clam|farmed mussel|farmed shrimp|farming shellfish|farming fish|farming oyster|farming clam|farming mussel|farming shrimp|shellfish farm|fish farm|oyster farm|clam farm|mussel farm|shrimp farm|aqua farm|farm market|farmer.* market|management.*plan|service.*agency|nrcs|aquafarm|aq…	farm shellfish|farm fish|farm oyster|farm clam|farm mussel|farm shrimp|farm shellfish|farmed fish|farmed oyster|farmed clam|farmed mussel|farmed shrimp|farming shellfish|farming fish|farming oyster|farming clam|farming mussel|farming shrimp|shellfish farm|fish farm|oyster farm|clam farm|mussel farm|shrimp farm|aqua farm|farm market|farmer.* market|management.*plan|service.*agency|nrcs|aquafarm|aq…
Beneficiary	Agricultural	Farmers	near		rice|vegetable|cranberr
Beneficiary	Agricultural	Foresters	include	forester|forestry|tree.*farm|silviculture	forest manage|forest indust|forest practices
Beneficiary	Agricultural	Foresters	exclude	braintree|Division of Parks & Forestry|Forestry Service|Forestry Association|Forestry Division|Division of|Department of|Forestry Agency|Forestry Assistance|Forestry council|Society of|forester.*tern|stree
Beneficiary	Agricultural	Foresters	near
Beneficiary	Commercial_Industrial	Commercial_Industrial	include	commercial|industry|industries|industrial|business	commerce
Beneficiary	Commercial_Industrial	Commercial_Industrial	exclude	commercial fish|commercial shellfish|commercial and sport fish|commercial and recreational fish|commercial pilot|commercial vessel|commercial ship|commercial boat|recreational industry|noncommercial	secretary|department|chamber|noaa
Beneficiary	Commercial_Industrial	Commercial_Industrial	near
Beneficiary	Commercial_Industrial	Food Extractors	include	hunt.*meat|trap.*meat|meat.*hunt|meat.*trap|hunt.*edible|trap.*edible|edible.*hunt|edible.*trap|hunt.*consumpt|trap.*consumpt|consumpt.*hunt|consumpt.*trap|hunt.*eaten|trap.*eaten|eaten.*hunt|eaten.*trap	fishing|shrimping|clamming|fisher	fisheries|fishery	shellfish| fish |oyster| clam |scallop|mussel|shrimp|meat|crab|salmon|oyster|crab|lobster|mullet|mussel|bass|herring|flounder|scallop|geoduck|crawfish|crayfish|crustacea|seafood	deer|waterfowl|duck|goose|geese|turkey|cottontail|rabbit|raccoon|squirrel| fox | foxes |possum| nutria|beaver| hogs|alligator|snake	food.*eat|eat.*food|food source	plant foods|food supply
Beneficiary	Commercial_Industrial	Food Extractors	exclude	riparian|buffer|vegetat|extrapolat|strap|entrap|strap|sediment.*trap|contam.*trap|pollut.*trap|trap.*contam|trap.*pollut|nutrient.*trap|trap.*nutrient|sand.*trap|trap.*sand|trap.*sediment|litter trap|imping|trap.*sediment|sediment.*trap|contam.*trap|pollut.*trap|trap.*contam|trap.*pollut|nutrient.*trap|trap.*nutrient|sand.*trap|trap.*sand|litter trap|fish trap|association|shunt|hunters pond|huntl…	kingfisher|workshop|salem|mysella|russell|economus|newmarket|fort fisher|Harvest brodiaea|Harvest brodiaea|fisher slough|fisherman island|fisherman.*inlet|productive|productivity|production|fisheries biologist|noncommercial	national marine fisheries service|fisheries biologist	productivity|production|workshop|ambassador|salmon falls|salem|mysella|russell|economus|newmarket|oyster creek|clami|spike|Harvest brodiaea|herring river|herring creek|bass river|herring cove|duck harbor|duck creek|swan street|timeat|salmonberry|productive|herring gull|salmon creek|salmon highway|salmon drift watershed council|salmon river|oystercatcher|noncommercial	productivity|production|workshop|duck farm|salem|mysella|russell|economus|Harvest brodiaea|duckbill valve|productive|tradeoff|trade-off|trade off|transport|hunt durey|abat|abutteragency|alligator weed|animal feeding|animal production|animal waste|apelt|aquarium care|askin|bass river|bata|batbing|bate|bath|bati|batk|bato|batr|batsto|batt|batu|beaver dam pond|beaver dam road|bird-foot delta|birdsey…
Beneficiary	Commercial_Industrial	Food Extractors	near	extract|commercial|business| product |industry|commodity|commodities|goods|harvest|profit|buy|livelihood|job|dealer|market|corporation| sale| sell|income|artisan|profession|trade|trading|worker	extract|commercial|business| product |industry|commodity|commodities|goods|harvest|profit|buy|livelihood|job|dealer|market|corporation| sale| sell|income|artisan|profession|trade|trading|worker		extract|commercial|business| product |industry|commodity|commodities|goods|harvest|profit|buy|livelihood|job|dealer|market|corporation| sale| sell|income|artisan|profession|trade|trading|worker	extract|commercial|business| product |industry|commodity|commodities|goods|harvest|profit|buy|livelihood|job|dealer|market|corporation| sale| sell|income|artisan|profession|trade|trading|worker	human| we |people
Beneficiary	Commercial_Industrial	Timber and Fiber and Ornamental Extractors	include	pine|wood|pulp|tree|timber|oak| elm|lumber|cedar|cypress| ash|maple|hickory|hardwood|cordwood|reed|grass|salt hay|marsh hay|turpentine	logging|logger|timber|lumber	shells|aquarium|aquaria|ornamental|pet store|aquatic plant	shell mining	firewood
Beneficiary	Commercial_Industrial	Timber and Fiber and Ornamental Extractors	exclude	grassroot|grass-root|reproduct|productivity|marshfield|marshall|braintree|park|sea grass|freed|mcreedy|sea-grass|eelgrass|oyster.*grass|seagrass|grassland|sea- grass|decreed|breed|agreed|haynes|hay.*barn|hayden|cottonwood|freed|cottontail|reedgrass|hayan|woody|lakewood|kirkwood|woodpecker|woods hole|wood dock|wood preserv|woodneck|woodbury|wood stake|wooden|wood tick|woodland|wood turtle|tree fro…	temperature.*log|log.*temperature|clogging|loggerhead|data logg|datalogg|timber snake|clogging|woody|invasive|nonnative|non.*native|manage|plan|goal|legislat|fish|threat.*watershed|watershed.*threat|threat.*habitat|habitat.*threat|harmful|marine|http|sewage|sanitary|acquatic|plastic|management.*area|runoff|stormwater|dredg|greek|ocean|sea|coast|septic|university|mcbp|landed|landing|landmark|counc…	eggshell|shellstock|workshop|productivity|reproduct|salem|mysella|russell|economus|Harvest brodiaea|productivity|production|productive|noncommercial		workshop|productivity|reproduct|salem|mysella|russell|economus|productivity|production|productive|noncommercial
Beneficiary	Commercial_Industrial	Timber and Fiber and Ornamental Extractors	near	extract|commercial|business| product |industry|commodity|commodities|goods|harvest|profit|buy|livelihood|job|dealer|market|corporation| sale| sell|income|artisan|profession|trade|trading|worker|weaver|basket maker		extract|commercial|business| product |industry|commodity|commodities|goods|harvest|profit|buy|livelihood|job|dealer|market|corporation| sale| sell|income|artisan|profession|trade|trading|worker		extract|commercial|business| product |industry|commodity|commodities|goods|harvest|profit|buy|livelihood|job|dealer|market|corporation| sale| sell|income|artisan|profession|trade|trading|worker
Beneficiary	Commercial_Industrial	Industrial Processors	include	industr.*process|process.*industr|commercial.*process|process.*commercial|industr.*product|product.*industr|product.*commercial|commercial.*product|develop.*product|product.*develop	manufact|textile|steel|factory|factories|canneries|cannery|papermill|paper mill	mill	chemical|iron|metal|oil|gas|petro|lime	mining|mine|quarry	processor
Beneficiary	Commercial_Industrial	Industrial Processors	exclude	in the process|farm|agricultur|commercial fish|commercial shellfish|commercial and sport fish|commercial and recreational fish|commercial pilot|commercial vessel|commercial ship|commercial boat|recreational industry|certification process|reproduct|noncommercial	steelhead|instruction|sawmill pond|satisfactor|geotext|cannery hill	reproduct|million|millimeter|millennia|milliliter|millirem|milligram|miller|mill.*creek|mill pond|millet|agricult|farm|grain|food|recreational industry|productivity|production|productive|noncommercial	viron|soil|slime|blime|clime|elime|plime|recreational industry	data.*min|determining|examining|determine|examine|promine|mineral|fluminea|shells|minen|mineu|amine|plaquemine|ermin|minello|deter-min|deter- min|minea|post-min|division|omine|smine|reclaim.*min|min.*reclaim|min.*reclam|reclam.*min|under- min|lettuce|quarrylake	meat|sugar|grain|vegetable|fruit|permit|eutrophication|degradation|review|bayview|this process|scoping process
Beneficiary	Commercial_Industrial	Industrial Processors	near			industr|business| product |commercial|company	industr|factory|factories|manufact|foundry|foundries|operation|refiner|facilit		seafood| fish |shellfish
Beneficiary	Commercial_Industrial	Pharmaceutical and Food Supplement Suppliers	include	pharmaceutical|medicin|vitamin|drug|medical|surgical	supplement	biotechnology|bio-technology
Beneficiary	Commercial_Industrial	Pharmaceutical and Food Supplement Suppliers	exclude		water.*supplement|supplement.*water|steelhead.*supplement|technical supplement|supplemental|supplemented|food web|foodweb|food chain|foodchain|feed on|feeds on|feeding on|source of food|food source
Beneficiary	Commercial_Industrial	Pharmaceutical and Food Supplement Suppliers	near	species|discovery|research|harvest|development|testing|purpose	food|nutrition|nutrient
Beneficiary	Commercial_Industrial	Fur_Hide Trappers and Hunters	include	skin | skinning|hide| fur | furs |fur-bear|fur bear|furbear|pelt|tanning|tannery|tanneries	deer|fowl|duck|goose|geese|turkey|cottontail|rabbit|raccoon|squirrel| fox | foxes |possum| nutria|beaver| hogs|alligator|snake	hunt|trap
Beneficiary	Commercial_Industrial	Fur_Hide Trappers and Hunters	exclude	reproduct|askin|pickerel|sking|salem|mysella|russell|economus|newmarket|sulfur|peltandra|pelto|apelt|peltu|pelta|pelte|provid.* no clue|provid.* notice|provid.* basis|provid.*expertise|workshop|skink|skin lesion|skin condition|furc|iskin|refur|pelti|rough-skinned newt|tannery brook|tannery creek|tannery market|tannery dam|bearskin neck|productivity|production|productive|noncommercial	reproduct|deerfield|productiv|harvest.*crop|crop.*harvest|harvest data|production|workshop|salem|mysella|russell|economus|abat|abutteragency|alligator weed|animal feeding|animal production|animal waste|apelt|aquarium care|askin|bass river|bata|batbing|bate|bath|bati|batk|bato|batr|batsto|batt|batu|beaver dam pond|beaver dam road|bird-foot delta|birdseye|blackbird creek|bullfrog creek|butter clam|…	reproduct|meat|sport|recreat|season|opportunit|edible|consumpt|eaten|riparian|buffer|vegetat|extrapolat|strap|entrap|strap|sediment.*trap|contam.*trap|pollut.*trap|trap.*contam|trap.*pollut|nutrient.*trap|trap.*nutrient|sand.*trap|trap.*sand|trap.*sediment|litter trap|fish trap|trap.*site|shunt|hunters pond|huntley|huntington|hunterdon|workshop|salem|mysella|russell|economus|newmarket|productivit…
Beneficiary	Commercial_Industrial	Fur_Hide Trappers and Hunters	near	extract|commercial|business| product |industry|commodity|commodities|goods|harvest|profit|buy|livelihood|job|dealer|market|corporation| sale| sell|income|artisan|profession|trade|trading|worker	skin | skinning|hide| fur | furs |fur-bear|fur bear|furbear|pelt|tanning|tannery|tanneries	extract|commercial|business| product |industry|commodity|commodities|goods|harvest|profit|buy|livelihood|job|dealer|market|corporation| sale| sell|income|artisan|profession|trade|trading|worker
Beneficiary	Commercial_Industrial	Private Energy Generators	include	solar.*power|solar.*electric|solar.*energy|energy.*solar|electric.*solar|power.*solar|turbine.*solar	wind.*power|wind.*electric|wind.*energy|energy.*wind|electric.*wind|power.*wind|turbine.*wind	water.*power|water.*electric|water.*energy|energy.*water|electric.*water|power.*water|turbine.*wave|turbine.*water|hydroelectric|hydro-elect|hydropower|hydro-power|dam.*electric|electric.*dam|energy.*dam|dam.*energy	geothermal system|geothermal energy|geothermal	renewable.*energy|renewable.*power|renewable.*electric|energy.*renewable|power.*renewable|electric.*renewable	private.*energy|private.*power|private.*electric
Beneficiary	Commercial_Industrial	Private Energy Generators	exclude	private property|manpower|powers authority|the power to|power flush|the power of the market|assume the power to	storm energy|wave energy|private property|manpower|powers authority|the power to|power flush|the power of the market|assume the power to	storm energy|wave energy|private property|damaged|damage|damde|dame|fundamental|watercraft|manpower|powers authority|the power to|power flush|the power of the market|assume the power to|water fowl	private property	private property|manpower|powers authority|the power to|power flush|the power of the market|assume the power to	storm energy|wave energy|powerful|food suppl|private property|powers authority|the power to|power flush|the power of the market|assume the power to
Beneficiary	Commercial_Industrial	Private Energy Generators	near	private	private	private	private	private	production|generat|suppl|station
Beneficiary	Commercial_Industrial	Private Water Plant Operators	include	drink.*water|water.*supply|water.*drink|supply.*water|water.*treatment|treatment.*water| dam | dams |desalination|water.*supplie|supplie.*water
Beneficiary	Commercial_Industrial	Private Water Plant Operators	exclude	watershed|wastewater|permit|division.*water|waterway|waterbod|beaver|water fowl
Beneficiary	Commercial_Industrial	Private Water Plant Operators	near	private|operator
Beneficiary	Commercial_Industrial	Commercial_Industrial Property Owner	include	commercial.*develop|develop.*commercial|industrial.*develop|develop.*industrial|commercial.*land|industrial.*land|commercial.*property|industrial.*property	business|industr|econom	marina|tourism|resort|hotel|shop|restaurant|landscaper|gardener|landscaping|landscape industry|marine-related business	landowner|land owner|owner|property|property owner	property protection
Beneficiary	Commercial_Industrial	Commercial_Industrial Property Owner	exclude	president|acqui|restor|purchase|buy|property.*tax|tax.*property|developing.*recommendation|island|recreational industry|landing|noncommercial	recreational industry	coast.*guard|zostera|marina.*guidebook|vistamar.*marina|recreational.*boating|negative|workshop|first resort|last resort|resort to|grasshop|zostera|bishop	recreational industry|noncommcercial	noncommercial
Beneficiary	Commercial_Industrial	Commercial_Industrial Property Owner	near		local		industr|commercial|business	industr|commercial|business
Beneficiary	Government and Municipal and Residential	Government and Municipal and Residential	include	government|municipal|village|county| town| city|public access|the public|public use|urban|rural|public good|public purpose	our communit|sustainable communit|local communit|waterfront communit|community plan|town|city|neighborhood|community outreach|community education	families| resident |children|citizen|family living	hazard|natural disaster|aquifer|development.*pattern|pattern.*development|coastal development|urban sprawl	open space	watershed| area|region|community|communities|country|state	our region|our country|our county|our state|our area|our watershed|the people of|all the people|all of the people|of the people	quality of life|public health|human health|wellbeing|well being|well-being|general health|general welfare	safe
Beneficiary	Government and Municipal and Residential	Government and Municipal and Residential	near						habitant|resident|occupant|living in|live in		habitant|resident|occupant|living in|live in	habitant|resident|occupant|living in|live in
Beneficiary	Government and Municipal and Residential	Government and Municipal and Residential	exclude	legend|turban|capacity|publicize|publicity|publication|townsend	presidential|biological.*communit|benthic.*communit|ocean.*city|residential.*land|habitat.*community|natural.*communities|resident.*shorebird|coral.*communit|capacity|plant.*communit|communit.*plant|ecologic.*communit|vegetat.*communit|animal.*communit|bottom.*communit|biotic.*communit|estuarine.*communit|oyster.*communit|communit.*type|meadow.*communit|tidal.*communit|communit.*native|native.*co…	resident.*develop|develop.*resident|homeowner|home owner|private.*land|private.*property|landowner|land owner|president|acqui|restor|purchase|buy|resident.*species|resident.*wildlife|resident.*animal|property.*tax|tax.*property|tax.*resident|resident.*tax|developing.*recommendation	hazardous		presidential|biological.*communit|benthic.*communit|ocean.*city|residential.*land|habitat.*community|natural.*communities|resident.*shorebird|coral.*communit|capacity|plant.*communit|communit.*plant|ecologic.*communit|vegetat.*communit|animal.*communit|bottom.*communit|biotic.*communit|estuarine.*communit|oyster.*communit|communit.*type|meadow.*communit|tidal.*communit|communit.*native|native.*co…		department of public health|public health department	boat|safeguard|pilot|harbor|port|vessel|ship
Beneficiary	Government and Municipal and Residential	Municipal Drinking Water Plant Operators	include	drink.*water|water.*supply|water.*drink|supply.*water|water.*treatment|treatment.*water|water.*supplie|supplie.*water	municipal well|public well	desal plant| dam | dams |desalination	municipal.*water|water.*municipal	drink.*water|water.*supply|water.*drink|supply.*water|water.*treatment|treatment.*water| dam | dams |desalination|water.*supplie|supplie.*water
Beneficiary	Government and Municipal and Residential	Municipal Drinking Water Plant Operators	exclude	private|operator|watershed|wastewater|permit|division.*water|waterway|waterbod|water fowl		private|operator|watershed|wastewater|permit|division.*water|waterway|waterbod|beaver	watershed|wastewater|permit|division.*water|waterway|waterbod|municipal park|municipalit|water fowl	watershed|wastewater|permit|division.*water|waterway|waterbod|beaver|water fowl
Beneficiary	Government and Municipal and Residential	Municipal Drinking Water Plant Operators	near					public|government|municipal|village|county|town| city|community
Beneficiary	Government and Municipal and Residential	Residential Property Owners	include	resident.*develop|develop.*resident|homeowner|home owner|private.*land|private.*property	homes|homeowner|housing|home-owner|home owner	residents|residential|private well|domestic well	landowner|land owner|owner|property|property owner	property protection	trailer park|neighborhood
Beneficiary	Government and Municipal and Residential	Residential Property Owners	near				residential|private	residential|private
Beneficiary	Government and Municipal and Residential	Residential Property Owners	exclude	president|acqui|restor|purchase|buy|resident.*species|resident.*wildlife|resident.*animal|property.*tax|tax.*property|tax.*resident|resident.*tax|developing.*recommendation|island|nonresidential	visitor housing|housing a |housing the	nonresidential	boat owner|nonresidential
Beneficiary	Government and Municipal and Residential	Military_Coast Guard	include	military|coast.*guard|navy|army|marines|air force|military training
Beneficiary	Government and Municipal and Residential	Military_Coast Guard	exclude	marinesanc|marineserv|marinespa
Beneficiary	Government and Municipal and Residential	Public Energy Generators	include	solar.*power|solar.*electric|solar.*energy|energy.*solar|electric.*solar|power.*solar|turbine.*solar	wind.*power|wind.*electric|wind.*energy|energy.*wind|electric.*wind|power.*wind|turbine.*wind	water.*power|water.*electric|water.*energy|energy.*water|electric.*water|power.*water|turbine.*wave|turbine.*water|hydroelectric|hydro-elect|hydropower|hydro-power|dam.*electric|electric.*dam|energy.*dam|dam.*energy	geothermal system|geothermal energy|geothermal	renewable.*energy|renewable.*power|renewable.*electric|energy.*renewable|power.*renewable|electric.*renewable	public.*energy|public.*power|public.*electric	powerline|power pole
Beneficiary	Government and Municipal and Residential	Public Energy Generators	exclude	public law|manpower|publication|powers authority|the power to|power flush|the power of the market|assume the power to	storm energy|wave energy|public law|manpower|publication|powers authority|the power to|power flush|the power of the market|assume the power to	storm energy|wave energy|damaged|damage|damde|dame|fundamental|watercraft|manpower|beaver dam|publication|powers authority|the power to|power flush|the power of the market|assume the power to|water fowl	publication	public law|manpower|publication|powers authority|the power to|power flush|the power of the market|assume the power to	storm energy|wave energy|powerful|food suppl|public law|man power|manpower|publication
Beneficiary	Government and Municipal and Residential	Public Energy Generators	near	public|government|municipal|village|county|town| city|community	public|government|municipal|village|county|town| city|community	public|government|municipal|village|county|town| city|community	public|government|municipal|village|county|town| city|community	public|government|municipal|village|county|town| city|community	production|generat|suppl|station
Beneficiary	Government and Municipal and Residential	Public Sector Property Owners	include	public sector.*develop|develop.*public sector|public sector.*land|public sector.*property	landowner|land owner|owner|property|property owner	property protection	Fish and Wildlife Service	government|municipal|village|county|town| city|public|community	infrastructur
Beneficiary	Government and Municipal and Residential	Public Sector Property Owners	exclude	president|acqui|restor|purchase|buy|property.*tax|tax.*property|developing.*recommendation|island|publication	public.*meeting	public.*meeting	public.*meeting	legend|turban|capacity|publicize|publicity|publication|townsend|publication|private property
Beneficiary	Government and Municipal and Residential	Public Sector Property Owners	near		public sector|public	public sector|public	public sector|landowner|land owner|property|property owner	property|building|infrastructur
Beneficiary	Commercial_Military Transportation	Commercial_Military Transportation	include	commercial.*transport|transport.*commercial|military.*transport|transport.*military	ship|vessel|air|rail|pilot|captain|navigation|train|navigability	highway|interstate|road| port |transport.*infrastruct|infrastruct.*transport	navigable|navigat	transportation facility
Beneficiary	Commercial_Military Transportation	Commercial_Military Transportation	exclude	sediment.*transport|transport.*sediment|contam.*transport|transport.*contam|nutrient.*transport|transport.*nutrient|cargo|goods|shipping|freight|commodit|container|people|commut|noncommercial	relationship|rship|nship|urship|sediment.*transport|transport.*sediment|contam.*transport|transport.*contam|nutrient.*transport|transport.*nutrient|cargo|goods|shipping|freight|commodit|container|people|commut|trail|pair|fair|air yam|air plant|chair|questionnaire|airborne|affair|millionaire|dairy|airshed|National.*Weather.*Service|impair|repair|belleair|air.*act|prair|clean.*air.*act|national.*ai…	broad|nroad|roadbl|sediment.*transport|transport.*sediment|contam.*transport|transport.*contam|nutrient.*transport|transport.*nutrient|roadbed|non-roadway
Beneficiary	Commercial_Military Transportation	Commercial_Military Transportation	near		transport|commercial	develop|alter|construct|site|siting|abandon|assess|remov|need|build|facilit
Beneficiary	Commercial_Military Transportation	Transporters of Goods	include	goods.*transport|transport.*goods|shipping|shipped|cargo|freight|bulk.*commodit	port	vessel|barge|gundalow	train|railroad|railway	rail|air|transport
Beneficiary	Commercial_Military Transportation	Transporters of Goods	exclude		transport|support|report|opportunit|import|portion|sport|portuguese|airport|portray|export|porta|puport|portugal|disproportion|westport|port.*native|purported|cockroach|susan|port.*of		training|trained|constrain|entrain|strain|train.*about	trail|pair|fair|air yam|air plant|chair|questionnaire|airborne|affair|millionaire|dairy|airshed|National.*Weather.*Service|impair|repair|belleair|air.*act|prair|clean.*air.*act|national.*air.*standard|regulat.*air|lair|Air Resource Specialist|Clean Air Bond|dair|www|Air Resources Lab|air rifle|air condition|airboat|stair|nair|bair|fair|air yam|air plant|air temp|hair|sediment.*transport|transport…
Beneficiary	Commercial_Military Transportation	Transporters of Goods	near		cargo|goods|shipping|freight|commodit|container	cargo|goods|shipping|freight|commodit|container	cargo|goods|shipping|freight|commodit|container	cargo|goods|shipping|freight|commodit|container
Beneficiary	Commercial_Military Transportation	Transporters of People	include	people.*transport|transport.*people	cruise|ferry|ferries|airplane|airport|airstrip|air.*runway|runway.*air|airfield|motor vehicle|vehicle	train|railroad|railway|gundalow	rail.*transportation|transportation.*rail	parking
Beneficiary	Commercial_Military Transportation	Transporters of People	exclude	sediment.*transport|transport.*sediment|contam.*transport|transport.*contam|nutrient.*transport|transport.*nutrient	cruise_mou	training|trained|constrain|entrain|strain|train.*about|train people	trail
Beneficiary	Commercial_Military Transportation	Transporters of People	near			commut|people|travel|passenger	commut|people|travel|passenger	area|lot
Beneficiary	Subsistence	Subsistence	include	subsistence	subsist|tribal|tribe|indigenous.*people|indian population|indian people|indigenous.*people|indian population|indian people|indian population|indian people|native.*person|native american|traditional use|traditional sustainable use|sustenance|traditional way|depend on the land|dependent on the land|dependent upon the land|traditional knowledge|traditional ecological knowledge|indians|indian reserva…	traditional use|traditional sustainable use|traditional way	depend on the land|dependent on the land|dependent upon the land
Beneficiary	Subsistence	Subsistence	near		resource|use|surviv
Beneficiary	Subsistence	Subsistence	exclude		because|horticultur|agricultur|alternativ|aqua.*cultur|monocultur|non-nativ|independent|interdependent|west indian manatee|department of natural resources
Beneficiary	Subsistence	Water Subsisters	include	cistern|rain.*barrel	water	store.*rain|rain.*store|storage.*rain|rain.*storage|collect.*rain|rain.*collect|collect.*rain|rain.*collect	water well|supply well|domestic well|private well|artesian well|shallow well|groundwater well
Beneficiary	Subsistence	Water Subsisters	near		subsistence|tribal|tribe|indigenous.*people|indian population|indian people|indigenous.*cultur|indigenous.*people|native cultur|native person|native american|native village|traditional use|traditional sustainable use|sustenance|traditional way|depend on the land|dependent on the land|dependent upon the land|indians|indian reservation	later use|reuse|re-use|drink|irrigat|water.*lawn|water.*grass|water.*yard	swells|wells reserve|wells bay|town of wells
Beneficiary	Subsistence	Water Subsisters	exclude	drain|train|brain|grain	horticultur|agricultur|alternativ|aqua.*cultur|monocultur|non-nativ|independent|interdependent|waterfront|waterfowl|watershed|west indian manatee|water fowl	restor|drain|train|brain|grain|rainbow|grass pickerel|water fowl
Beneficiary	Subsistence	Timber and Fiber and Fur_Hide Subsisters	include	skins | skinning|hide| fur | furs |fur-bear|fur bear|furbear|pelt|tanning|feather	timber|fiber|wood|pulp|pine|oak|cypress| elm| ash|maple|hickory|hardwood|cedar|cordwood|reed|grass|salt hay|salt marsh hay|turpentine	firewood|campfire
Beneficiary	Subsistence	Timber and Fiber and Fur_Hide Subsisters	exclude	askin|sking|salem|mysella|russell|economus|newmarket|sulfur|peltandra|horticultur|agricultur|alternativ|aqua.*cultur|monocultur|non-nativ|pelto|apelt|peltu|pelta|pelte|provid.* no clue|provid.* notice|provid.* basis|provid.*expertise|pelti|refur|furc|iskin|skink|skin lesion|skin condition|independ|rough-skinned newt|west indian manatee	grassroot|grass-root|independ|marshfield|marshall|braintree|park|woody|lakewood|kirkwood|woodpecker|woods hole|wood dock|wood preserv|woodneck|woodbury|wood stake|wooden|wood tick|woodland|wood turtle|tree frog|woodbridge|treated lumber|treated wood|wood stove|reproduct|horticultur|agricultur|alternativ|aqua.*cultur|monocultur|non-nativ|cash|category|sewage|sanitary|acquatic|management.*area|fish…
Beneficiary	Subsistence	Timber and Fiber and Fur_Hide Subsisters	near	subsistence|tribal|tribe|indigenous.*people|indian population|indian people|indigenous.*cultur|indigenous.*people|native cultur|native person|native american|native village|traditional use|traditional sustainable use|sustenance|traditional way|depend on the land|dependent on the land|dependent upon the land|indians|indian reservation	subsistence|tribal|tribe|indigenous.*people|indian population|indian people|indigenous.*cultur|indigenous.*people|native cultur|native person|native american|native village|traditional use|traditional sustainable use|sustenance|traditional way|depend on the land|dependent on the land|dependent upon the land|indians|indian reservation
Beneficiary	Subsistence	Building Material Subsisters	include	grass|reed|mud|stone|rock|granit|limestone|shells|sand	build|construct
Beneficiary	Subsistence	Building Material Subsisters	near	subsistence|tribal|tribe|indigenous.*people|indian population|indian people|indigenous.*cultur|indigenous.*people|native cultur|native person|native american|native village|traditional use|traditional sustainable use|sustenance|traditional way|depend on the land|dependent on the land|dependent upon the land|indians|indian reservation	subsistence|tribal|tribe|indigenous.*people|indian population|indian people|indigenous.*cultur|indigenous.*people|native cultur|native person|native american|native village|traditional use|traditional sustainable use|sustenance|traditional way|depend on the land|dependent on the land|dependent upon the land|indians|indian reservation
Beneficiary	Subsistence	Building Material Subsisters	exclude	grassroot|grass-root|independ|capstone|keystone|touchstone|horticultur|agricultur|alternativ|aqua.*cultur|monocultur|non-nativ|cornerstone|agreed|breed|milestone|rockport|rocky mountain|gabion|rockcress|rockfish|larock|rock crab|shamrock|rock shrimp|rock cancer|rockaway|rocky|Rock Cove|rockingham|bedrock|rock fish|rock jasmine|rockport|rockaway|rocky|Rock Cove|sediment|channel|hammock|legend|dune…	horticultur|agricultur|alternativ|aqua.*cultur|monocultur|non-nativ|capacity
Beneficiary	Subsistence	Food and Medicinal Subsisters	include	food|medicine|medicinal|medical|hunt|gatherer|gathering|harvest	food|berries|berry|mushroom|fruit|vegetabl|herb|shellfish|rice|hunt| fish |shrimp|salmon|oyster|crab|lobster|mullet|mussel|bass|herring|flounder| clam |duck|deer|waterfowl|honey|deer|fowl|duck|goose|geese|turkey|cottontail|rabbit|raccoon|squirrel| fox | foxes |possum| nutria|beaver| hogs|alligator|snake	medicine|reed|seaweed|saltwater
Beneficiary	Subsistence	Food and Medicinal Subsisters	near	subsistence|tribal|tribe|indigenous.*people|indian population|indian people|indigenous.*cultur|indigenous.*people|native cultur|native person|native american|native village|traditional use|traditional sustainable use|sustenance|traditional way|depend on the land|dependent on the land|dependent upon the land|indians|indian reservation	subsistence|tribal|tribe|indigenous.*people|indian population|indian people|indigenous.*cultur|indigenous.*people|native cultur|native person|native american|native village|traditional use|traditional sustainable use|sustenance|traditional way|depend on the land|dependent on the land|dependent upon the land|indians|indian reservation	subsistence|tribal|tribe|indigenous.*people|indian population|indian people|indigenous.*cultur|indigenous.*people|native cultur|native person|native american|native village|traditional use|traditional sustainable use|sustenance|traditional way|depend on the land|dependent on the land|dependent upon the land|indians|indian reservation
Beneficiary	Subsistence	Food and Medicinal Subsisters	exclude	web|chain|food.*species|flock|shelter|data|food waste|food bag|west indian manatee|food web|foodweb|food chain|foodchain|feed on|feeds on|feeding on|source of food|food source|indian head river|indiana|hunt durey|medical building|medical center|hunting island	horticultur|agricultur|alternativ|aqua.*cultur|monocultur|non-nativ|ambassador|salmon falls|independent|interdependent|duck farm|clami|oyster creek|herring river|herring creek|bass river|herring cove|duck harbor|duck creek|swan street|duckbill valve|west indian manatee|salmonberry|deer fern|food web|foodweb|food chain|foodchain|feed on|feeds on|feeding on|source of food|food source|indian head ri…	west indian manatee|indian head river|indiana
Beneficiary	Recreational	Recreational	include	recreation|vacation|amenities|visitor|tourist|tourism|visiting	golf course|athletic field|baseball|football|soccer
Beneficiary	Recreational	Recreational	exclude	research|scien|student|teach|visiting wildlife|flower-visiting
Beneficiary	Recreational	Experiencers and Viewers	include	horseback rid|hike|hiking|rock climb|bike|biking|bicycl|camping|camper|camps|campground|birding|birder|outing|sightsee|shelling|picnic|off-road vehicle|birdwatch|bird watch|wildlife view|view wildlife|encounter|nature tour|bird blind|watch bird	outdoor|natur|wildlife|animal|wildflower|out-of doors	pier|waterfront|boardwalk	trail	family|families|children|visitor|touris|roamer|roaming	collect|gather|pick	view|watcher|watching|witness	scenic|scenery|horizon|skyline|vantage point|vistas|observation point|observation deck|observation platform|observation area|vista point|scenic vista|natural vista|beauty|beautiful|panorama|panoramic|viewscape|view scape|idyllic	sight	outdoor|natur|wildlife|animal|bird	sound|listen|sensation|sensory|auditory|noise|audible|scent|sensory|olfactory|auditory|smell|listen|noise|aroma|visual|insects.*hear|hear.*insects|fragrant|fragrance	sunrise|sunset|eclipse|sundown|rainbow|twilight|storm
Beneficiary	Recreational	Experiencers and Viewers	exclude	campaign|suppl|campbell|salmon.*camp|highigh|management.*issue|forsythe|jug.*bay|answers.*question|divert|wastewater|steelhead|diversion|trailer|traillii|hitchhike|ladder|passage barrier|barriers|bay scallop|scouting	bayview|review|bayview|overview|in view of|over-view|over- view|peer|viewpoint|purview|viewed|observ.*study|professional|angler|fish|boat|hunt|swimmer|swimming|diver|diving|swam|collect|gather|pick|natural resource|naturally|broader view|broad view|often overlook|may be overlooked|overlook.*concern|national wildlife refuge|data viewer|experienced	pierce|piermont|pierson|pieris|fishing pier|pierre|waterfront resident	trailer|hitchhike|traillii|hunt|trailing	bayview|review|bayview|overview|in view of|over-view|over- view|peer|viewpoint|purview|viewed|observ.*study|professional|angler|fish|boat|hunt|swimmer|swimming|diver|diving|swam|collect|gather|pick|natural resource|naturally|broader view|broad view|often overlook|may overlook|overlook.*concern|national wildlife refuge|data viewer|experienced	transplant|gather.*for.*hunt|pickerel|minerals management service	bayview|viewcontent|views as issues|target view|view.*data|points of view|elevation view|known view|view this document|seek the view|solicit the view|reflect the view|review|bayview|interview|data.*network|aesthetic.*nuisance|aesthetic.*problem|aesthetic.*degradation|vista.*hermosa|vistamar|views.*agency|views.*department|sewage.*collection|aerial.*view.*modif|15.*visitor|treatment|keep.*louisian…	meadow beauty|river beauty|beautiful jacob|spring beauty|meadow-beauty|meadowbeauty|horizontal|deepwater horizon|may be overlooked|overlook.*concern|beautyberry|often overlook|Harper.*beauty		bayview|review|bayview|overview|in view of|over-view|over- view|peer|viewpoint|purview|viewed|observ.*study|professional|angler|fish|boat|hunt|swimmer|swimming|diver|diving|swam|collect|gather|pick|natural resource|naturally|snowbird|broad view|broader view|often overlook|may overlook|overlook.*concern|national wildlife refuge|data viewer	aromaticum|listening post|environmentally sound|western sound|polycylic|george sound|west sound|south sound|pugetsound|sound science|sound improvement|Albemarle sound|pamlico sound|long island sound|art|educat|inspir|the sound|Puget sound|croaker|buffer|listening session|fluorescent|quiescent|crescent|audubon|15.*visitor|noxious|unpleasant|using|increasing|rising|losing|accessing|dressing|crossin…	rodent|staff|presentation|created.*volunteer|15.*visitor|pollution|pollutant|climate|temperature|marina|island|provision|15.*visitor|trout|smelt|sunset of|sunset on|biofog|to sunset|image|imaging|clouded|navigat|sunset of|sunset on|sunset in|sunsets on|sunsets in|infog|turbid|rainbow snake|after sunset|rainbow star|rainbow surf|sunset at|before sunset|sunset cove|sunrise to|data viewer
Beneficiary	Recreational	Experiencers and Viewers	near		scenic|panoramic|aesthetic|experienc|enjoy|relax|observ|view|overlook|vista|opportun			outdoor|natur|wildlife|animal|scenic|panoramic|wildflower|aesthetic|view|observ|overlook|vista|experienc|enjoy|relax|opportun	natural material|flower|shells|seeds|natural object|plants|insects|fungi|mushroom|minerals|rocks	spectacle|natur|environment|ecosystem|estuary|coastal|landscape|ocean|shore|water|accomodat|activit|aesthetic|ameniable|amenit|appreciat|artisan|artist| art | arts |asset|attract|beaut|beneficial|benefit|bequest|bountiful|bounty|business|buy| care| caring|charisma|cherish|children|collect|comfort|commercial|commodities|commodity|goods|concern|conserv|corporation|critical|dealer|delicious|desired|…		comfort|desirable|destination|enjoy|favorable|pleasant|popular|relax|special|spectacular|tours|tourist|tourism|visit|treasure|well suited|well-suited|wonder|allure|appeal|alluring|mystique|extraordinary|excellent|amaze|amazing|stunning|majestic|spectacular|scenic	view|overlook|vista|watch|sight|observ		view|overlook|watch|sight|observ
Beneficiary	Recreational	Food Pickers and Gatherers	include	collect|pick|gather|recreat|edible|recreat|sport|visitor|touris	collect|pick|gather|recreat|edible|recreat|sport|visitor|touris	recreat|sport|opportunit|experienc|enjoy|relax|families|family|children|visitor|touris	clammer|clamming|shellfisher|shellfishing|clam.*dig|dig.*clam|shellfish.*dig|dig.*shellfish|shell fisher|shell fishing	collect|pick|gather|recreat|sport|trail|season|opportunit|experienc|enjoy|relax|families|family|children
Beneficiary	Recreational	Food Pickers and Gatherers	near	food|berries|berry|mushroom|fruit|herbs|nut|roots|asparagus	shellfish| clam |oyster|lobster|mussel|crab|shrimp|crawfish|crayfish|crustacea|shell fish	clammer|clamming|shellfisher|shellfishing|clam.*dig|dig.*clam|shellfish.*dig|dig.*shellfish|shell fisher|shell fishing		edible
Beneficiary	Recreational	Food Pickers and Gatherers	exclude	requirement|review|bayview|data|specimen|nutrient|nutria|minute|transport|cranberr|hunt|trap|food web|foodweb|food chain|foodchain	requirement|review|bayview|data|specimen|transport|fishery|fisheries|horseshoe crab|samples|clami|pickerel|oyster creek|oystercatcher	indigenous|digest|fishery|fisheries|clamming creek|experienced	extract|commercial|business|product|industry|commodity|commodities|goods|harvest|profit|buy|livelihood|job|dealer|market|corporation| sale| sell|income|artisan|profession|indigenous|digest|fishery|fisheries|trade|trading|reproduct|productivity|salem|mysella|russell|economus|clamming creek	experienced
Beneficiary	Recreational	Hunters	include	hunt|trap	hunt|trapper|trapping	waterfowl|deer|duck|beaver|nutria|alligator|hogs|rabbit|raccoon|squirrel| fox | foxes |possum| nutria|beaver| hogs|alligator|snake	animal.*game|bird.*game|wild.*game|harvest.*game|game.*animal|game.*bird|game.*wild|game.*harvest	hide| skins | skinning| fur | furs |fur-bear|fur bear|furbear|pelt
Beneficiary	Recreational	Hunters	exclude	transport|riparian|buffer|vegetat|extrapolat|strap|entrap|strap|sediment.*trap|contam.*trap|pollut.*trap|trap.*contam|trap.*pollut|nutrient.*trap|trap.*nutrient|sand.*trap|trap.*sand|trap.*sediment|litter trap|fish trap|lobster trap|trap.*site|transport|lobster|shunt|hunters pond|hunts point|silt.*trap|trap.*silt|hunt durey|experienced|hunting creek|hunting island	extract|commercial|business|product|industry|commodity|commodities|goods|harvest|profit|buy|livelihood|job|dealer|market|corporation| sale| sell|income|artisan|profession|shunt|hunters pond|huntley|huntington|hunterdon|trade|trading|transport|riparian|buffer|vegetat|extrapolat|strap|entrap|strap|sediment.*trap|contam.*trap|pollut.*trap|trap.*contam|trap.*pollut|nutrient.*trap|trap.*nutrient|sand.…	transport|duck farm|quahogs|abat|abutteragency|alligator weed|animal feeding|animal production|animal waste|apelt|aquarium care|askin|bass river|bata|batbing|bate|bath|bati|batk|bato|batr|batsto|batt|batu|beaver dam pond|beaver dam road|bird-foot delta|birdseye|blackbird creek|bullfrog creek|butter clam|buttercup|butterfish|butterfly orchid|buttermilk|butterwort|CAFO|c-hawk|chid|combat|dairy|davi…	snowbird|birdseye|games|oyste bird	askin|sking|salem|mysella|russell|economus|newmarket|sulfur|peltandra|horticultur|agricultur|alternativ|aqua.*cultur|monocultur|non-nativ|pelto|apelt|peltu|pelta|pelte|provid.* no clue|provid.* notice|provid.* basis|provid.*expertise|pelti|refur|furc|iskin|skink|skin lesion|skin condition|subsist|tribal|tribe|indigenous.*people|indian population|indian people|indigenous.*cultur|indigenous.*people…
Beneficiary	Recreational	Hunters	near	recreat|sport|opportunit|experienc|enjoy|relax|families|family|children|visitor|tours|tourist|tourism|visit|permit|activit|activities		recreat|sport|permit	recreat|sport|opportunit|experienc|enjoy|relax|families|family|children|visitor|tours|tourist|tourism|visit|permit|activit|activities	recreat|sport|opportunit|experienc|enjoy|relax|families|family|children|visitor|tours|tourist|tourism|visit|permit|activit|activities
Beneficiary	Recreational	Anglers	include	angler|angling	fisher|fishing	fly-fishing|fly fishing|fly fisher|fly-fisher|flyfisher|flyfishing	bait	fishermen|fisherman|fishing
Beneficiary	Recreational	Anglers	near		recreat|sport|game|opportunit|experienc|enjoy|relax|families|family|children|visitor|tours|tourist|tourism|visit|salt water|saltwater|salt-water|fresh water|freshwater|fresh-water		salem|reproduc|productivity
Beneficiary	Recreational	Anglers	exclude	dangl|rangl|sangl|tangl|bangl|wangl	shellfish|shell fish|kingfisher|fishery|fisheries|fort fisher|games|fisher creek|fisher slough|fisherman island|fisherman.*inlet|experienced		commercial|business|industry|commodity|commodities|goods|profit|buy|livelihood|job|dealer|market|corporation| sale| sell|income|artisan|profession|trade|trading|worker|fishery|fisheries	commercial|business|industry|commodity|commodities|goods|profit|buy|livelihood|job|dealer|market|corporation| sale| sell|income|artisan|profession|trade|trading|worker|fishery|fisheries|subsist|tribal|tribe|indigenous.*people|indian population|indian people|indigenous.*cultur|indigenous.*people|indian population|indian people|native.*person|native american|traditional use|traditional sustainable …
Beneficiary	Recreational	Waders and Swimmers and Divers	include	snorkel|SCUBA|swim|swam|wade|diving|dive|diver|wading|bather|bathing	surfer|surfing
Beneficiary	Recreational	Waders and Swimmers and Divers	exclude	diversi|diverse|divert|biodiversity|diving.*duck|wastewater|steelhead|diversion|flock|spoonbill| egret|waterfowl|wading.*bird|swamp|kwader|diverg|swimming crab|migrat.*swim|SWIM plan|diving seabirds|diving cetaceans|nesting wader|divest|research|scien|specimen.*collect|sample.*collect|data.*collect|collect.*specimen|collect.*sample|collect.*data|gather.*data|data.*gather|monitor|diversity|biodive…
Beneficiary	Recreational	Boaters	include	boat|canoe|kayak|rowing|jetski|jet.*ski|watercraft|paddle	harbor|dock|marina|channel
Beneficiary	Recreational	Boaters	near		traffic|wake|activit|moor|private|public|access|available|crowd
Beneficiary	Recreational	Boaters	exclude	growing|longboat.*pass|surface|boat.*method|borrow|burrow|crow|hrow|grow|volcano|rrow|steamboat slough road|paddlefish|boat basin	public safety|public support|Bight|haddock|curl|sour|tropic|paraguay|fiddle|swamp|docket|harbor seal|dock permit|New Bedford Harbor|zostera|publicize|publicity|publication|little egg harbor
Beneficiary	Inspirational	Inspirational	include	inspir|cultural.*significance|cherish|treasure|wonder|beaut|renowned	culture|cultural|historic	sense of place|sense of community|pride|way of life
Beneficiary	Inspirational	Inspirational	exclude	treasurer|meadow beauty|river beauty|beautiful jacob|spring beauty|meadowbeauty|meadow-beauty|beautyberry|Harper.*beauty	agricultur|aquacultur|horticultur|silvicultur|multicultur|agri.*cultur|aqua.*cultur|culturing|data|abundance|biomass|habitat|temperature value|biomass value|cultured|historical range|historically|monocultur|rice culture|department of natural resources	scotian pride
Beneficiary	Inspirational	Inspirational	near		significan|value|valuable|valuing|important|vital|resource|need
Beneficiary	Inspirational	Spiritual and Ceremonial Participants	include	festival|observance|religi|ceremon|baptism|wedding|spirit|worship|prayer	community event|special event|popular.*event|free event	day	story|stories|artwork
Beneficiary	Inspirational	Spiritual and Ceremonial Participants	exclude	formal.*designation.*ceremony|entrepreneur|cooperation|spirit of trust|spirit lake|sprayer	storm event|precipitation event	storm event|precipitation event
Beneficiary	Inspirational	Spiritual and Ceremonial Participants	near			event|sponsor|participate|participant	totem|sacred|spirit animal
Beneficiary	Inspirational	Artists	include	poet|painter|artist|sculpture|sculptor|sculpting|carving|pottery|photographer|photography|painting|artwork| art | arts |mural|nature photog|outdoor photog|environmental photog|local photog|cinematographer	writer|writing|author	contest
Beneficiary	Inspirational	Artists	near		inspir|environment|outdoor|natur|visit|tour|creativ	christmas card|essay|poetry| art |photograph
Beneficiary	Inspirational	Artists	exclude	sculpta|aerial photograph|digitiz|orthophotograph|sculptus|the art of|the art and science of|photo-voltaic|photovoltaic|popcorn flower|popcornflower|shankpainter|art martin|willapa art trail|liberal arts|state of the art	document|research|grant|authori|TMDL|plan|law	sculpta|aerial photograph|digitiz|orthophotograph|sculptus|the art of|the art and science of|art martin|willapa art trail
Beneficiary	Learning	Learning	include	learn	museum|visitor.*center	diorama| graphic	interpretive|interactive|educat	natural history	program|center	history tour|discovery lab|lab offering
Beneficiary	Learning	Learning	exclude	clearnose|lessons learned			the estuary program|national estuary program|shoreline master program		abatement|manage|the estuary program|national estuary program|shoreline master program
Beneficiary	Learning	Learning	near			museum|visitor.*center	trail|guide|center|program|panel|exhibit		environment|outdoor|science|educat|nature|natural
Beneficiary	Learning	Educators and Students	include	educat|academ|teach|professor|student|elementary|middle.*school|junior.*high|secondary.*school|high.*school|school.*children|fieldtrip|field trip|outdoor lab|classroom|classes|internship|outdoor school|K-12|college|university|study|school	youth development
Beneficiary	Learning	Educators and Students	exclude	educational.*seminar|grf|educat.*center|educat.*plan|stress classes
Beneficiary	Learning	Educators and Students	near
Beneficiary	Learning	Researchers	include	research|scien|specimen.*collect|sample.*collect|data.*collect|collect.*specimen|collect.*sample|collect.*data|gather.*data|data.*gather|study|monitor	research lab|visiting scientist|postdoc|post-doc|graduate student|graduate research|monitoring|research|scien|specimen.*collect|sample.*collect|data.*collect|collect.*specimen|collect.*sample|collect.*data|gather.*data|data.*gather|monitor|biologist|ecologist|study	research.* use| use.*research| use.*scien|scien.* use|support.*research|enable.*research|enabling.*research|for research|scientific.*resource|resource.*scientific
Beneficiary	Learning	Researchers	near	promote|promotion|opportunit|encourag|accomodat|attract|interest|initiative|potential|purpose|permit|improve.*knowledge|enhance.*knowledge|knowledge.*improve|knowledge.*enhance|improve.*learn|enhance.*learn|learn.*improve|learn.*enhance|permission|engage|visit|excellent|estuarine lab|natural lab|field lab|marine lab|enhanc.*understand|promoting|enhancing
Beneficiary	Learning	Researchers	exclude	Marine Protection, Research, and Sanctuaries Act|MPRSA|Research Reserve|scientific name		house|scientific name
Beneficiary	Non-Use	Non-Use	include	non-use|nonuse|non use
Beneficiary	Non-Use	Non-Use	exclude
Beneficiary	Non-Use	Non-Use	near	resource|opportunit|valu
Beneficiary	Non-Use	People Who Care (Existence)	include	endangered|threatened|refuge|sanctuary|conservation|preservation|conserve|preserve	species of concern|species of special concern|endangered species|threatened species|ecologically sensitive|environmentally sensitive|sensitive ecosystem|sensitive aquatic|sensitive area|sensitive species	rare|protect|critical	existence value|right to exist
Beneficiary	Non-Use	People Who Care (Existence)	near			organism|vertebrate|invertebrate|species|animal|bird|fauna|flora|plant|wildlife|raptor|fauna|animal|mammal|wildlife|bird| owl |fowl|duck|sparrow|warbler|plover|falcon|osprey|hawk|eagle|pelican|geese|pidgeon|pigeon|turtle|tortoise|seal|manatee| otter |dragonfl|insect|beetle| bee | bees|honey-bee| moth | moths|butterfly|butterflies|entomolo| bug | bugs |deer|waterfowl|duck|goose|reptile|alligator|a…
Beneficiary	Non-Use	People Who Care (Existence)	exclude			rarely|hazard.*protect|protect.*hazard|flood.*protect|storm.*protect|shoreline.*protect|coastal.*protect|dune.*protect|wave.*protect|erosion.*protect|protect.*flood|protect.*storm|protect.*shoreline|protect.*coastal|protect.*dune|protect.*wave|protect.*erosion|protect public health|protect public safety|toad flax|toadflax|duck harbor|duck creek|swan street|fowler|sealevel|birdseye|duckbill valve|…
Beneficiary	Non-Use	People Who Care (Option_Bequest)	include	bequest|option value|steward|landtrust|land trust|inheritance trust|sustainable|sustainability	future|next	intergeneration|inter-generation|grandchildren|grand-children	future|heritage|legacy|inherit
Beneficiary	Non-Use	People Who Care (Option_Bequest)	exclude		power|electric|next generation sequencing		temperature value|biomass value|the regional
Beneficiary	Non-Use	People Who Care (Option_Bequest)	near		generation		enjoy|preserv|conserv|invest|protect|significan|value|valuable|valuing|important|vital|resource|need|coast|estuar| bay| lands|nature|natural|wild|the area|the region|our area|our region|the watershed|our watershed
Beneficiary	Humanity	All Humans	include	humanity|everyone|humankind|all ages|all people	quality of life|public.* health|health.*public|people.*health|health.*people|human health|wellbeing|well being|well-being|general health|general welfare|benefit people|human environment	safe
Beneficiary	Humanity	All Humans	exclude	activit	department of public health|public health department	boat|safeguard|pilot|harbor|port|vessel|ship|maritime safety|hunter safety|wildlife safety|hunting safety
Beneficiary	Humanity	All Humans	near
Environment	Tidal wetland	Tidal wetlands unspecified	include	wetland|tidal wetland|marsh|tidal marsh|swamp|tidal swamp	tidal fresh
Environment	Tidal wetland	Tidal wetlands unspecified	near
Environment	Tidal wetland	Tidal wetlands unspecified	exclude	nontidal|nontidal wetland|subtidal|inland|freshwater|palustrine|lake|river|riverine|stream|streambed|submerged|underwater|beach|dune|patbogen|marshfield|marshall|brown tide|red tide|browntide|redtide|forested wetland|forested tidal wetland|tidal forested wetland|wooded swamp|emergent wetland|emergent marsh|herbaceous wetland|marshland|saltmarsh|salt marsh|saltwater marsh|brackish marsh|brackish h…	tidal freshwater wetland|tidal freshwater marsh
Environment	Forested wetland	Forested tidal wetland	include	forested wetland|wooded swamp|hammock|hardwood|woodland|ash tree	forested tidal wetland|tidal freshwater forest*|tidal forest* wetland|bayou	red maple|Acer rubrum|American elm|Ulmus americana|Fraxinus|green ash|red ash|Fraxinus pennsylvanica|black ash|Fraxinus nigra|oregon ash|Fraxinus latifolia|Nyssa|black gum|Nyssa sylvatica|tupelo gum|Nyssa aquatica|Quercus|swamp white oak|Quercus bicolor|overcup oak|Quercus lyrata|basket oak|Quercus michauxii|Sitka spruce|Picea sitchensis|red alder|Alnus rubra|Thuja|western red cedar|Thuja occiden…
Environment	Forested wetland	Forested tidal wetland	near	tidal|coast|coastal|salt|saline|estuar*		tidal|coast|coastal|salt|saline|estuar*| bay |brackish
Environment	Forested wetland	Forested tidal wetland	exclude	nontidal|nontidal wetland|subtidal|inland|freshwater|palustrine|lake|river|riverine|stream|streambed|submerged|underwater|beach|dune|stree	nontidal|nontidal wetland|subtidal|inland|palustrine|lake|river|riverine|stream|streambed|submerged|underwater|beach|dune|bayou history center|bayou interfaith|bayou grace|bayou lacombe center|Bayou Grand Bay National Wildlife Refuge|bayou sauvage	double oak farm|Bayou Grand Bay National Wildlife Refuge
Environment	Forested wetland	Mangrove	include	mangrove|mangroves	red mangrove|Rhizophora mangle|white mangrove|Laguncularia racemosa|buttonwood|button mangrove|Conocarpus erectus|black mangrove|Avicennia germinans
Environment	Forested wetland	Mangrove	near		tidal|coast|coastal|salt|saline|estuar*| bay |brackish
Environment	Forested wetland	Mangrove	exclude	nontidal|nontidal wetland|subtidal|inland|freshwater|palustrine|lake|river|riverine|stream|streambed|submerged|underwater|beach|dune	nontidal|nontidal wetland|subtidal|inland|freshwater|palustrine|lake|river|riverine|stream|streambed|submerged|underwater|beach|dune
Environment	Emergent wetland	Emergent wetland unspecified	include	emergent wetland|emergent marsh|emergent hydrophyte|herbaceous wetland|marshland|meadow|tidal bog
Environment	Emergent wetland	Emergent wetland unspecified	near	tidal|coast|coastal|salt|saline|estuar*| bay |brackish
Environment	Emergent wetland	Emergent wetland unspecified	exclude	nontidal|nontidal wetland|subtidal|inland|freshwater|palustrine|lake|river|riverine|stream|streambed|submerged|underwater|beach|dune|seagrass| sea grass
Environment	Emergent wetland	Brackish or Salt Marsh	include	marsh hay|arrow.*grass|cordgrass|glasswort|common glasswort|saltwort|samphire|pickleweed|saltgrass|turtleweed|beachwort	saltmarsh|salt marsh|salt hay|saltwater marsh|brackish marsh|brackish high marsh|brackish low marsh|tidal marsh	Spartina|saltmarsh cordgrass|Spartina alterniflora|saltmeadow cordgrass|Spartina patens|big cordgrass|Spartina cynosuroides|california cordgrass|Spartina foliosa|Sarcocornia|Salicornia|american glasswort|Salicornia virginica|sea blite|Suaeda californica|seaside arrow.*grass|Triglochin maritimum|Deschampsia|tufted hairgrass|Deschampsia cespitosa|Distichlis|desert saltgrass|Distichlis spicata|Phala…
Environment	Emergent wetland	Brackish or Salt Marsh	near	tidal|coast|coastal|salt|saline|estuar*| bay |brackish		tidal|coast|coastal|salt|saline|estuar*| bay |brackish
Environment	Emergent wetland	Brackish or Salt Marsh	exclude	nontidal|nontidal wetland|subtidal|inland|freshwater|palustrine|lake|river|riverine|stream|streambed|submerged|underwater|beach|dune|salt marsh skipper
Environment	Emergent wetland	Emergent tidal fresh wetland	include	sedge|rush|spikerush|bulrush	tidal fresh* wetland|tidal river|tidal freshwater marsh|tidal fen	Typha|narrow.*leaf cattail|Typha angustifolia|common cattail|Typha latifolia|Carex|lyngbye.*s sedge|Carex lyngbyei|southern wild rice|Zizaniopsis miliacea|Juncus|needlerush|Juncus roemerianus|Spergularia|canadian sandspurry|Spergularia canadensis|common reed|Phragmites|Schoenoplectus|Scirpus|Eleocharis
Environment	Emergent wetland	Emergent tidal fresh wetland	near	tidal|coast|coastal|estuar*		tidal|coast|coastal|estuar*
Environment	Emergent wetland	Emergent tidal fresh wetland	exclude	nontidal|nontidal wetland|subtidal|inland|palustrine|lake|river|riverine|stream|streambed|submerged|underwater|beach|dune	nontidal|nontidal wetland|subtidal|inland|palustrine|lake|river|riverine|stream|streambed|submerged|underwater|beach|dune	nontidal|nontidal wetland|subtidal|inland|palustrine|lake|river|riverine|stream|streambed|submerged|underwater|beach|dune
Environment	Scrub-shrub wetland	Scrub-shrub wetland	include	scrub.*shrub|shrub.*scrub|shrubs|shrub|shrub swamp|willow|saltbush|orach|orache	sea.*myrtle|Baccharis halimifolia|marsh elder|Iva frutescens|Cornus|red.*osier dogwood|Cornus sericea|Cornus stolonifera|sweetgale|Myrica gale|bald cypress|Taxodium distichum|black spruce|Picea mariana|pond pine|Pinus serotina|Atriplex
Environment	Scrub-shrub wetland	Scrub-shrub wetland	near	tidal|coast|coastal|salt|saline|estuar*| bay |brackish	tidal|coast|coastal|salt|saline|estuar*| bay |brackish
Environment	Scrub-shrub wetland	Scrub-shrub wetland	exclude	nontidal|nontidal wetland|subtidal|inland|freshwater|palustrine|lake|river|riverine|stream|streambed|submerged|underwater|beach|dune|bayberry	nontidal|nontidal wetland|subtidal|inland|freshwater|palustrine|lake|river|riverine|stream|streambed|submerged|underwater|beach|dune
EEP	Flora	Flora	include	beneficial|benefit|bequest|bountiful|bounty| care| caring|children|comfort|goods|conserv|critical|dealer|destination|educat|encourag|enthusiast|experienc|families|family|future|healthy|initiative|jewel|learn|leisure|lifeblood|livelihood|option value|opportunit|participant|participate|preserv|purpose|protect|quality.*life|recreat|relax|restor|save|saving|specimen|sport|sustainabl|together|tours|to…	native.*plant|plant.*native|native.*flora|flora.*native|native.*vegetation|vegetation.*native|plant community
EEP	Flora	Flora	exclude	processing plant|aguirre plant|pauciflora|plant.*upgrade|upgrade.*plant|planted|planting|plantation|grassroot|grass-root|braintree|elm street|pine brook|greenbush|bushel|package plant|transplant|power plant|carene|treatment plant|invasive plant|carex|carey|personal care|careo|aquarium care|lawn care|careful|decreed|breed|hayden|cottonwood|freed|reedgrass|agreed|elderberry|cash|category|sewage|san…	pauciflora|processing plant|aguirre plant
EEP	Flora	Flora	near	flora|plant|flower|grass|kelp|seaweed|algae|algal|vegetation|mangrove|reed|cypress|sphagnum|cattail|moss|palm|berry|berries|seeds|fruit|nuts|tree|sedge|moss|lichen|pine|oak|cypress| elm| ash|maple|hickory|hardwood|cedar|daffodil|tulip|tupelo|iris|lily|water lily|orchid|pitcher plant|carnivorous plant|willow|sundew|sedge|loosestrife|bogbean| fern|shrub| bush| vine|leaf| root| seed| stem| bark|poll…
EEP	Flora	Flora Community	include	community|communities|diversity|biodiversity|food chain|food web|diverse
EEP	Flora	Flora Community	exclude	processing plant|aguirre plant|pauciflora|plant.*upgrade|upgrade.*plant|planted|planting|plantation|grassroot|grass-root|braintree|elm street|pine brook|greenbush|bushel|package plant|transplant|power plant|carene|treatment plant|invasive plant|carex|carey|personal care|careo|aquarium care|lawn care|careful|decreed|breed|hayden|cottonwood|freed|reedgrass|agreed|elderberry|cash|category|sewage|san…
EEP	Flora	Flora Community	near	flora|plant|flower|grass|kelp|seaweed|algae|algal|vegetation|mangrove|reed|cypress|sphagnum|cattail|moss|palm|berry|berries|seeds|fruit|nuts|tree|sedge|moss|lichen|pine|oak|cypress| elm| ash|maple|hickory|hardwood|cedar|daffodil|tulip|tupelo|iris|lily|water lily|orchid|pitcher plant|carnivorous plant|willow|sundew|sedge|loosestrife|bogbean| fern|shrub| bush| vine|leaf| root| seed| stem| bark|poll…
EEP	Flora	Edible Flora	include	edible| eat | ate |food|delicious|subsist|sustenance|forage	food .*human|human.*food|food .*people|people.*food|forage.*human|human.*forage|forage .*people|people.*forage
EEP	Flora	Edible Flora	exclude	County SEED|oyster|seeding|dispers|pumpkinseed|processing plant|aguirre plant|pauciflora|plant.*upgrade|upgrade.*plant|planted|planting|plantation|grassroot|grass-root|braintree|elm street|pine brook|greenbush|bushel|package plant|transplant|power plant|carene|treatment plant|invasive plant|carex|carey|personal care|careo|aquarium care|lawn care|careful|decreed|breed|hayden|cottonwood|freed|reedg…	stree|double oak farm
EEP	Flora	Edible Flora	near	flora|plant|flower|grass|kelp|seaweed|algae|algal|vegetation|mangrove|reed|cypress|sphagnum|cattail|moss|palm|berry|berries|seeds|fruit|nuts|tree|sedge|moss|lichen|pine|oak|cypress| elm| ash|maple|hickory|hardwood|cedar|daffodil|tulip|tupelo|iris|lily|water lily|orchid|pitcher plant|carnivorous plant|willow|sundew|sedge|loosestrife|bogbean| fern|shrub| bush| vine|leaf| root| seed| stem| bark|poll…	flora|plant|flower|grass|kelp|seaweed|algae|algal|vegetation|mangrove|reed|cypress|sphagnum|cattail|moss|palm|berry|berries|seeds|fruit|nuts|tree|sedge|moss|lichen|pine|oak|cypress| elm| ash|maple|hickory|hardwood|cedar|daffodil|tulip|tupelo|iris|lily|water lily|orchid|pitcher plant|carnivorous plant|willow|sundew|sedge|loosestrife|bogbean| fern|shrub| bush| vine|leaf| root| seed| stem| bark|poll…
EEP	Flora	Medicinal Flora	include	medicin|medical|healing|ailment|disease.*people|people.*disease|human.*disease|disease.*human|vaccine|pharmaceutic
EEP	Flora	Medicinal Flora	exclude	poisonous|toxic|processing plant|aguirre plant|pauciflora|plant.*upgrade|upgrade.*plant|planted|planting|plantation|grassroot|grass-root|braintree|elm street|pine brook|greenbush|bushel|package plant|transplant|power plant|carene|treatment plant|invasive plant|carex|carey|personal care|careo|aquarium care|lawn care|careful|decreed|breed|hayden|cottonwood|freed|reedgrass|agreed|elderberry|cash|cat…
EEP	Flora	Medicinal Flora	near	flora|plant|flower|grass|kelp|seaweed|algae|algal|vegetation|mangrove|reed|cypress|sphagnum|cattail|moss|palm|berry|berries|seeds|fruit|nuts|tree|sedge|moss|lichen|pine|oak|cypress| elm| ash|maple|hickory|hardwood|cedar|daffodil|tulip|tupelo|iris|lily|water lily|orchid|pitcher plant|carnivorous plant|willow|sundew|sedge|loosestrife|bogbean| fern|shrub| bush| vine|leaf| root| seed| stem| bark|poll…
EEP	Flora	Keystone Flora	include	keystone|important species|vital species|keystone.*species|ecolog.*engineer|ecosyst.*engineer|foundation.*species
EEP	Flora	Keystone Flora	exclude	processing plant|aguirre plant|pauciflora|plant.*upgrade|upgrade.*plant|planted|planting|plantation|grassroot|grass-root|braintree|elm street|pine brook|greenbush|bushel|package plant|transplant|power plant|carene|treatment plant|invasive plant|carex|carey|personal care|careo|aquarium care|lawn care|careful|decreed|breed|hayden|cottonwood|freed|reedgrass|agreed|elderberry|cash|category|sewage|san…
EEP	Flora	Keystone Flora	near	flora|plant|flower|grass|kelp|seaweed|algae|algal|vegetation|mangrove|reed|cypress|sphagnum|cattail|moss|palm|berry|berries|seeds|fruit|nuts|tree|sedge|moss|lichen|pine|oak|cypress| elm| ash|maple|hickory|hardwood|cedar|daffodil|tulip|tupelo|iris|lily|water lily|orchid|pitcher plant|carnivorous plant|willow|sundew|sedge|loosestrife|bogbean| fern|shrub| bush| vine|leaf| root| seed| stem| bark|poll…
EEP	Flora	Charismatic Flora	include	aesthetic|allure|alluring|appeal|amaze|amazing|ameniable|amenit|appreciat|asset|attract|beaut|charisma|desired|desirable|enhance|enhancing|enjoy|encounter|extraordinary|excellent|favor|favorable|feel|hallmark|inspir|interest|majestic|mystique|observ|pleasant|popular|sight|spectacular|stunning|view|watch|wonder| wild |pick|collect
EEP	Flora	Charismatic Flora	exclude	processing plant|aguirre plant|pauciflora|plant.*upgrade|upgrade.*plant|planted|planting|plantation|grassroot|grass-root|braintree|elm street|pine brook|greenbush|bushel|package plant|transplant|power plant|carene|treatment plant|invasive plant|carex|carey|personal care|careo|aquarium care|lawn care|careful|decreed|breed|hayden|cottonwood|freed|reedgrass|agreed|elderberry|cash|category|sewage|san…
EEP	Flora	Charismatic Flora	near	flora|plant|flower|grass|kelp|seaweed|algae|algal|vegetation|mangrove|reed|cypress|sphagnum|cattail|moss|palm|berry|berries|seeds|fruit|nuts|tree|sedge|moss|lichen|pine|oak|cypress| elm| ash|maple|hickory|hardwood|cedar|daffodil|tulip|tupelo|iris|lily|water lily|orchid|pitcher plant|carnivorous plant|willow|sundew|sedge|loosestrife|bogbean| fern|shrub| bush| vine|leaf| root| seed| stem| bark|poll…
EEP	Flora	Rare Flora	include	rare|endangered|red list|endemic|species of concern|species of special concern|species of management concern|endangered.*species|threatened.*species|species.*endangered|species.*threatened|threatened|federally listed
EEP	Flora	Rare Flora	exclude	processing plant|aguirre plant|pauciflora|plant.*upgrade|upgrade.*plant|planted|planting|plantation|grassroot|grass-root|braintree|elm street|pine brook|greenbush|bushel|package plant|transplant|power plant|carene|treatment plant|invasive plant|carex|carey|personal care|careo|aquarium care|lawn care|careful|decreed|breed|hayden|cottonwood|freed|reedgrass|agreed|elderberry|cash|category|sewage|san…
EEP	Flora	Rare Flora	near	flora|plant|flower|grass|kelp|seaweed|algae|algal|vegetation|mangrove|reed|cypress|sphagnum|cattail|moss|palm|berry|berries|seeds|fruit|nuts|tree|sedge|moss|lichen|pine|oak|cypress| elm| ash|maple|hickory|hardwood|cedar|daffodil|tulip|tupelo|iris|lily|water lily|orchid|pitcher plant|carnivorous plant|willow|sundew|sedge|loosestrife|bogbean| fern|shrub| bush| vine|leaf| root| seed| stem| bark|poll…
EEP	Flora	Commercially Important Flora	include	business|buy|commercial|commodit|company|corporation|econom|exploit|extract|goods|harvest|income|industry|job|market| product |profession|profit|promote|promotion|resource| sell| sale|trade|trading
EEP	Flora	Commercially Important Flora	exclude	processing plant|aguirre plant|pauciflora|plant.*upgrade|upgrade.*plant|planted|planting|plantation|grassroot|grass-root|braintree|elm street|pine brook|greenbush|bushel|package plant|transplant|power plant|carene|treatment plant|invasive plant|carex|carey|personal care|careo|aquarium care|lawn care|careful|decreed|breed|hayden|cottonwood|freed|reedgrass|agreed|elderberry|cash|category|sewage|san…
EEP	Flora	Commercially Important Flora	near	flora|plant|flower|grass|kelp|seaweed|algae|algal|vegetation|mangrove|reed|cypress|sphagnum|cattail|moss|palm|berry|berries|seeds|fruit|nuts|tree|sedge|moss|lichen|pine|oak|cypress| elm| ash|maple|hickory|hardwood|cedar|daffodil|tulip|tupelo|iris|lily|water lily|orchid|pitcher plant|carnivorous plant|willow|sundew|sedge|loosestrife|bogbean| fern|shrub| bush| vine|leaf| root| seed| stem| bark|poll…
EEP	Flora	Spiritually_Culturally Important Flora	include	spiritual|cultural|festiv|ceremon|ritual|cherish|tradition|legacy|tribal|tribe|heritage|steward|indian population|indian people|indigenous.*people|indigenous.*person|native.*person|native american
EEP	Flora	Spiritually_Culturally Important Flora	exclude	processing plant|aguirre plant|pauciflora|plant.*upgrade|upgrade.*plant|planted|planting|plantation|grassroot|grass-root|braintree|elm street|pine brook|greenbush|bushel|package plant|transplant|power plant|carene|treatment plant|invasive plant|carex|carey|personal care|careo|aquarium care|lawn care|careful|decreed|breed|hayden|cottonwood|freed|reedgrass|agreed|elderberry|cash|category|sewage|san…
EEP	Flora	Spiritually_Culturally Important Flora	near	flora|plant|flower|grass|kelp|seaweed|algae|algal|vegetation|mangrove|reed|cypress|sphagnum|cattail|moss|palm|berry|berries|seeds|fruit|nuts|tree|sedge|moss|lichen|pine|oak|cypress| elm| ash|maple|hickory|hardwood|cedar|daffodil|tulip|tupelo|iris|lily|water lily|orchid|pitcher plant|carnivorous plant|willow|sundew|sedge|loosestrife|bogbean| fern|shrub| bush| vine|leaf| root| seed| stem| bark|poll…
EEP	Flora	Pest Flora	include	pest|invasive|non-native|not native|weed.*species|nuisance|noxious weed	biologic control|biocontrol|biological control|natural population control|natural check|natural control|biologic means|biological means|biologic methods|biological methods|natural pathogen control|natural pest control|natural disease control|depredator|pest predator|natural insect control|natural pest control|agricultural environmental management|IPM|integrated pest management
EEP	Flora	Pest Flora	exclude	processing plant|aguirre plant|pauciflora|plant.*upgrade|upgrade.*plant|planted|planting|plantation|grassroot|grass-root|braintree|elm street|pine brook|greenbush|bushel|package plant|transplant|power plant|carene|treatment plant|carex|carey|personal care|careo|aquarium care|lawn care|careful|decreed|breed|hayden|cottonwood|freed|reedgrass|agreed|elderberry|cash|category|sewage|sanitary|acquatic|…	uipm|hipm|processing plant|aguirre plant|pauciflora|plant.*upgrade|upgrade.*plant|planted|planting|plantation|grassroot|grass-root|braintree|package plant|transplant|power plant|carene|treatment plant|invasive plant|carex|carey|personal care|careo|aquarium care|lawn care|careful|decreed|breed|hayden|cottonwood|freed|reedgrass|agreed|elderberry|cash|category|sewage|sanitary|acquatic|management.*ar…
EEP	Flora	Pest Flora	near	flora|plant|flower|grass|kelp|seaweed|algae|algal|vegetation|mangrove|reed|cypress|sphagnum|cattail|moss|palm|berry|berries|seeds|fruit|nuts|tree|sedge|moss|lichen|pine|oak|cypress| elm| ash|maple|hickory|hardwood|cedar|daffodil|tulip|tupelo|iris|lily|water lily|orchid|pitcher plant|carnivorous plant|willow|sundew|sedge|loosestrife|bogbean| fern|shrub| bush| vine|leaf| root| seed| stem| bark|poll…	flora|plant|flower|grass|kelp|seaweed|algae|algal|vegetation|mangrove|reed|cypress|sphagnum|cattail|moss|palm|berry|berries|seeds|fruit|nuts|tree|sedge|moss|lichen|pine|oak|cypress| elm| ash|maple|hickory|hardwood|cedar|daffodil|tulip|tupelo|iris|lily|water lily|orchid|pitcher plant|carnivorous plant|willow|sundew|sedge|loosestrife|bogbean| fern|shrub| bush| vine|leaf| root| seed| stem| bark|poll…
EEP	Fungi	Fungi	include	beneficial|benefit|bequest|bountiful|bounty| care| caring|children|comfort|goods|conserv|critical|dealer|destination|educat|encourag|enthusiast|experienc|families|family|future|healthy|initiative|jewel|learn|leisure|lifeblood|livelihood|option value|opportunit|participant|participate|preserv|purpose|protect|quality.*life|recreat|relax|restor|save|saving|specimen|sport|sustainabl|together|tours|to…	native.*fungi|fungi.*native|native.*fungus|fungus.*native
EEP	Fungi	Fungi	exclude	fungicide|chemical|oak.*death|mushroomed|agency|askin|pickerel|by-product|byproduct|by product|chid|entrap|strap|sediment.*trap|contam.*trap|pollut.*trap|trap.*contam|trap.*pollut|trap.*nutrient|nutrient.*trap|sand.*trap|trap.*sand|trap.*sediment|litter trap|fish trap|especial|power.*generation|electric.*generation|generation plant|generation facilit|laboratory observ|field observ|lab observ|spec…
EEP	Fungi	Fungi	near	fungus|fungi|mushroom
EEP	Fungi	Fungal Community	include	community|communities|diversity|biodiversity|symbio.*|mycorrhiz.*|food chain|food web|diverse
EEP	Fungi	Fungal Community	exclude	fungicide|chemical|oak.*death|mushroomed|agency|askin|pickerel|by-product|byproduct|by product|chid|entrap|strap|sediment.*trap|contam.*trap|pollut.*trap|trap.*contam|trap.*pollut|trap.*nutrient|nutrient.*trap|sand.*trap|trap.*sand|trap.*sediment|litter trap|fish trap|especial|power.*generation|electric.*generation|generation plant|generation facilit|laboratory observ|field observ|lab observ|spec…
EEP	Fungi	Fungal Community	near	fungal|fungi|fungus|mushroom
EEP	Fungi	Edible Fungi	include	edible| eat | ate |food| wild |delicious|subsist|sustenance|forage	food .*human|human.*food|food .*people|people.*food|forage.*human|human.*forage|forage .*people|people.*forage
EEP	Fungi	Edible Fungi	exclude	nonedible|poisonous|mushroomed|fungicide|chemical|oak.*death|mushroomed|agency|askin|pickerel|by-product|byproduct|by product|chid|entrap|strap|sediment.*trap|contam.*trap|pollut.*trap|trap.*contam|trap.*pollut|trap.*nutrient|nutrient.*trap|sand.*trap|trap.*sand|trap.*sediment|litter trap|fish trap|especial|power.*generation|electric.*generation|generation plant|generation facilit|laboratory obse…
EEP	Fungi	Edible Fungi	near	fungal|fungi|fungus|mushroom	fungal|fungi|fungus|mushroom
EEP	Fungi	Medicinal Fungi	include	medicin|medical|healing|ailment|disease.*people|people.*disease|human.*disease|disease.*human|vaccine|pharmaceutic
EEP	Fungi	Medicinal Fungi	exclude	poisonous|toxic|fungicide|chemical|oak.*death|mushroomed|agency|askin|pickerel|by-product|byproduct|by product|chid|entrap|strap|sediment.*trap|contam.*trap|pollut.*trap|trap.*contam|trap.*pollut|trap.*nutrient|nutrient.*trap|sand.*trap|trap.*sand|trap.*sediment|litter trap|fish trap|especial|power.*generation|electric.*generation|generation plant|generation facilit|laboratory observ|field observ…
EEP	Fungi	Medicinal Fungi	near	fungi|fungal|fungus|mushroom
EEP	Fungi	Keystone Fungi	include	keystone|important species|vital species|keystone.*species|ecolog.*engineer|ecosyst.*engineer|foundation.*species
EEP	Fungi	Keystone Fungi	exclude	fungicide|chemical|oak.*death|mushroomed|agency|askin|pickerel|by-product|byproduct|by product|chid|entrap|strap|sediment.*trap|contam.*trap|pollut.*trap|trap.*contam|trap.*pollut|trap.*nutrient|nutrient.*trap|sand.*trap|trap.*sand|trap.*sediment|litter trap|fish trap|especial|power.*generation|electric.*generation|generation plant|generation facilit|laboratory observ|field observ|lab observ|spec…
EEP	Fungi	Keystone Fungi	near	fungal|fungi|fungus|mushroom
EEP	Fungi	Charismatic Fungi	include	aesthetic|allure|alluring|appeal|amaze|amazing|ameniable|amenit|appreciat|asset|attract|beaut|charisma|desired|desirable|enhance|enhancing|enjoy|encounter|extraordinary|excellent|favor|favorable|feel|hallmark|inspir|interest|majestic|mystique|observ|pleasant|popular|sight|spectacular|stunning|view|watch|wonder| wild |pick|collect
EEP	Fungi	Charismatic Fungi	exclude	fungicide|chemical|oak.*death|mushroomed|agency|askin|pickerel|by-product|byproduct|by product|chid|entrap|strap|sediment.*trap|contam.*trap|pollut.*trap|trap.*contam|trap.*pollut|trap.*nutrient|nutrient.*trap|sand.*trap|trap.*sand|trap.*sediment|litter trap|fish trap|especial|power.*generation|electric.*generation|generation plant|generation facilit|laboratory observ|field observ|lab observ|spec…
EEP	Fungi	Charismatic Fungi	near	fungal|fungi|fungus|mushroom
EEP	Fungi	Rare Fungi	include	rare|endangered|red list|endemic|species of concern|species of special concern|species of management concern|endangered.*species|threatened.*species|species.*endangered|species.*threatened|threatened|federally listed
EEP	Fungi	Rare Fungi	exclude	fungicide|chemical|oak.*death|mushroomed|agency|askin|pickerel|by-product|byproduct|by product|chid|entrap|strap|sediment.*trap|contam.*trap|pollut.*trap|trap.*contam|trap.*pollut|trap.*nutrient|nutrient.*trap|sand.*trap|trap.*sand|trap.*sediment|litter trap|fish trap|especial|power.*generation|electric.*generation|generation plant|generation facilit|laboratory observ|field observ|lab observ|spec…
EEP	Fungi	Rare Fungi	near	fungal|fungi|fungus|mushroom
EEP	Fungi	Commercially Important Fungi	include	business|buy|commercial|commodit|company|corporation|econom|exploit|extract|goods|harvest|income|industry|job|market| product |profession|profit|promote|promotion|resource| sell| sale|trade|trading
EEP	Fungi	Commercially Important Fungi	exclude	fungicide|chemical|oak.*death|mushroomed|agency|askin|pickerel|by-product|byproduct|by product|chid|entrap|strap|sediment.*trap|contam.*trap|pollut.*trap|trap.*contam|trap.*pollut|trap.*nutrient|nutrient.*trap|sand.*trap|trap.*sand|trap.*sediment|litter trap|fish trap|especial|power.*generation|electric.*generation|generation plant|generation facilit|laboratory observ|field observ|lab observ|spec…
EEP	Fungi	Commercially Important Fungi	near	fungal|fungi|fungus|mushroom
EEP	Fungi	Spiritually_Culturally Important Fungi	include	spiritual|cultural|festiv|ceremon|ritual|cherish|tradition|legacy|tribal|tribe|heritage|steward|indian population|indian people|indigenous.*people|indigenous.*person|native.*person|native american
EEP	Fungi	Spiritually_Culturally Important Fungi	exclude	fungicide|chemical|oak.*death|mushroomed|agency|askin|pickerel|by-product|byproduct|by product|chid|entrap|strap|sediment.*trap|contam.*trap|pollut.*trap|trap.*contam|trap.*pollut|trap.*nutrient|nutrient.*trap|sand.*trap|trap.*sand|trap.*sediment|litter trap|fish trap|especial|power.*generation|electric.*generation|generation plant|generation facilit|laboratory observ|field observ|lab observ|spec…
EEP	Fungi	Spiritually_Culturally Important Fungi	near	fungal|fungi|fungus|mushroom
EEP	Fungi	Pest Fungi	include	pest|invasive|non-native|not native|weed .species|nuisance	biologic control|biocontrol|biological control|natural population control|natural check|natural control|biologic means|biological means|biologic methods|biological methods|natural pathogen control|natural pest control|natural disease control|depredator|pest predator|natural insect control|natural pest control|agricultural environmental management|IPM|integrated pest management	mold
EEP	Fungi	Pest Fungi	exclude	fungicide|chemical|oak.*death|mushroomed|agency|askin|pickerel|by-product|byproduct|by product|chid|entrap|strap|sediment.*trap|contam.*trap|pollut.*trap|trap.*contam|trap.*pollut|trap.*nutrient|nutrient.*trap|sand.*trap|trap.*sand|trap.*sediment|litter trap|fish trap|especial|power.*generation|electric.*generation|generation plant|generation facilit|laboratory observ|field observ|lab observ|spec…	uipm|hipm|oak.*death|mushroomed
EEP	Fungi	Pest Fungi	near	fungal|fungi|fungus|mushroom	fungal|fungi|fungus|mushroom
EEP	Fauna	Fauna	include	beneficial|benefit|bequest|bountiful|bounty| care| caring|children|comfort|goods|conserv|critical|dealer|destination|educat|encourag|enthusiast|experienc|families|family|future|healthy|initiative|jewel|learn|leisure|lifeblood|livelihood|option value|opportunit|participant|participate|preserv|purpose|protect|quality.*life|recreat|relax|restor|save|saving|sight|specimen|sport|sustainabl|together|to…	native.*animal|animal.*native|native.*fauna|fauna.*native|native.*wildlife|wildlife.*native	accomodat|activit|aesthetic|allure|appeal|alluring|amaze|amazing|ameniable|amenit|appreciat|artisan|artist| art | arts |asset|attract|beaut|beneficial|benefit|bequest|bountiful|bounty|business|buy| care| caring|charisma|cherish|children|collect|comfort|commercial|commodities|commodity|goods|concern|conserv|corporation|critical|dealer|delicious|desired|desirable|destination|diversity|econom|edible…
EEP	Fauna	Fauna	exclude	toad flax|toadflax|goosefoot|snowbird|geoduck|domestic animal|production of animal|production of plants and animal|turtle cove|turtleback|animal production|insecticide|otter point creek|bullfrog creek|buttercup|buttermilk|butterwort|abutter|butter clam|rookerybay|rookery bay|batbing|bato|batk|tbat|batsto|bata|abat|bate|bath|bati|batu|blackbird creek|dairy|c-hawk|hawken|redbug|lowl|batr|muskin|sea…		toad flax|toadflax|goosefoot|snowbird|geoduck|domestic animal|production of animal|production of plants and animal|turtle cove|turtleback|animal production|insecticide|otter point creek|bullfrog creek|buttercup|buttermilk|butterwort|abutter|butter clam|rookerybay|rookery bay|batbing|bato|batk|tbat|batsto|bata|abat|bate|bath|bati|batu|blackbird creek|dairy|c-hawk|hawken|redbug|lowl|batr|muskin|sea…
EEP	Fauna	Fauna	near	animal|fauna|wildlife|mammal|bird|reptile|amphibian| fish |insect		marine.*species|wetland.*species|aquatic.*species|fresh.*species|estuar.*species
EEP	Fauna	Fauna_mammals	include	mammal|seal| otter |deer|beaver| elk |moose|cougar|panther|fox|muskrat|raccoon|nutria|bobcat|lynx|marten|coyote|rabbit
EEP	Fauna	Fauna_mammals	exclude	toad flax|toadflax|goosefoot|snowbird|geoduck|domestic animal|production of animal|production of plants and animal|turtle cove|turtleback|animal production|insecticide|otter point creek|bullfrog creek|buttercup|buttermilk|butterwort|abutter|butter clam|rookerybay|rookery bay|batbing|bato|batk|tbat|batsto|bata|abat|bate|bath|bati|batu|blackbird creek|dairy|c-hawk|hawken|redbug|lowl|batr|muskin|sea…
EEP	Fauna	Fauna_mammals	near
EEP	Fauna	Fauna_birds	include	bird|fowl|raptor|falcon|osprey|hawk|eagle| owl |waterfowl|duck|geese|goose|heron|ibis|spoonbill|mallard| egret |songbird|sparrow|warbler|wrens|blackbird|thrush|plover|rookery|rookerie
EEP	Fauna	Fauna_birds	exclude	toad flax|toadflax|goosefoot|snowbird|geoduck|domestic animal|production of animal|production of plants and animal|turtle cove|turtleback|animal production|insecticide|otter point creek|bullfrog creek|buttercup|buttermilk|butterwort|abutter|butter clam|rookerybay|rookery bay|batbing|bato|batk|tbat|batsto|bata|abat|bate|bath|bati|batu|blackbird creek|dairy|c-hawk|hawken|redbug|lowl|batr|muskin|sea…
EEP	Fauna	Fauna_birds	near
EEP	Fauna	Fauna_insects	include	insect|dragonfly|damselfly|beetle| bee | bees|honeybee|honey-bee| moth | moths|butterfly|butterflies	invertebrates| worms| snail
EEP	Fauna	Fauna_insects	exclude	toad flax|toadflax|goosefoot|snowbird|geoduck|domestic animal|production of animal|production of plants and animal|turtle cove|turtleback|animal production|insecticide|otter point creek|bullfrog creek|buttercup|buttermilk|butterwort|abutter|butter clam|rookerybay|rookery bay|batbing|bato|batk|tbat|batsto|bata|abat|bate|bath|bati|batu|blackbird creek|dairy|c-hawk|hawken|redbug|lowl|batr|muskin|sea…	shrimp|oyster|crab|lobster|mussel|abalone|scallop|clam|geoduck|mollusk
EEP	Fauna	Fauna_insects	near
EEP	Fauna	Fauna_reptiles	include	reptile|alligator|snake|python|cottonmouth|amphibian|frog| toad| newt |salamander
EEP	Fauna	Fauna_reptiles	exclude	toad flax|toadflax|goosefoot|snowbird|geoduck|domestic animal|production of animal|production of plants and animal|turtle cove|turtleback|animal production|insecticide|otter point creek|bullfrog creek|buttercup|buttermilk|butterwort|abutter|butter clam|rookerybay|rookery bay|batbing|bato|batk|tbat|batsto|bata|abat|bate|bath|bati|batu|blackbird creek|dairy|c-hawk|hawken|redbug|lowl|batr|muskin|sea…
EEP	Fauna	Fauna_reptiles	near
EEP	Fauna	Fauna_fish	include	fish |seahorse|aquaria|aquarium|seafood|salmon|shrimp|oyster| pike |crab|lobster|mullet|mussel|bass|herring|grouper|snapper|alewife|flounder|abalone|scallop| clam |geoduck|mollusk|crustacean	fish |seahorse|aquaria|aquarium|seafood|shrimp|salmon|oyster| pike |crab|lobster|mullet|mussel|bass|herring|grouper|snapper|alewife|flounder|abalone|scallop| clam |geoduck	bait	fish |seahorse|aquaria|aquarium|seafood|salmon|shrimp|oyster| pike |crab|lobster|mullet|mussel|bass|herring|grouper|snapper|alewife|flounder|abalone|scallop| clam |geoduck	seafood|fishery|fisheries|angler|angling|shellfish garden|oyster garden|shellfish farm|oyster farm|fishing|fisherman|fishermen|shellfish	wildstock|wild.*stock|stock.*wild|wild.*catch|catch.*wild|wild.*caught|caught.*wild
EEP	Fauna	Fauna_fish	exclude	toad flax|toadflax|goosefoot|snowbird|geoduck|domestic animal|production of animal|production of plants and animal|turtle cove|turtleback|animal production|insecticide|otter point creek|bullfrog creek|buttercup|buttermilk|butterwort|abutter|butter clam|rookerybay|rookery bay|batbing|bato|batk|tbat|batsto|bata|abat|bate|bath|bati|batu|blackbird creek|dairy|c-hawk|hawken|redbug|lowl|batr|muskin|sea…	oyster shells|reclam|clami|horseshoe crab|oystercatcher|agency|askin|pickerel|by-product|byproduct|by product|chid|entrap|strap|sediment.*trap|contam.*trap|nutrient.*trap|pollut.*trap|trap.*contam|trap.*nutrient|trap.*pollut|sand.*trap|trap.*sand|trap.*sediment|litter trap|especial|power.*generation|electric.*generation|generation plant|generation facilit|laboratory observ|field observ|lab observ…		kingfisher|fort fisher|fish river|dogfish creek|dogfish head|herring gull|salmon creek|salmon highway|salmon drift watershed council|salmon river|oystercatcher	fisherman island|national marine fisheries service|oystercatcher	livestock|wildlife|wild animal|spike|clami|herring river|herring creek|bass river|herring cove|duck harbor|duck creek|swan street|salmonberry|toms river|herring gull|salmon creek|salmon highway|salmon drift watershed council|salmon river|oystercatcher
EEP	Fauna	Fauna_fish	near		accomodat|activit|aesthetic|ameniable|amenit|appreciat|artisan|artist| art | arts |asset|attract|beaut|beneficial|benefit|bequest|biodiversity|bountiful|bounty|business|buy| care| caring|charisma|cherish|children|collect|comfort|commercial|commodities|commodity|goods|concern|conserv|corporation|critical|dealer|delicious|desired|desirable|destination|econom|edible|educat|encourag|endangered|enhanc…	fish |shrimp	essential habitat|critical habitat|feeding ground		fish |seahorse|aquaria|aquarium|seafood|salmon|shrimp|oyster| pike |crab|lobster|mullet|mussel|bass|herring|grouper|snapper|alewife|flounder|abalone|scallop| clam |geoduck|river|stream
EEP	Fauna	Fauna Community	include	community|communities|diversity|biodiversity|food chain|food web|diverse
EEP	Fauna	Fauna Community	exclude	herring river|snake creek|snake island|snake pond|eagle hill|duck harbor|duck creek|swan street|birdseye|duckbill valve|eagle holt|national wildlife refuge|david fox|sparrows point|west fowl river|oyste bird|salmonberry|potter|solomon.*seal|deer fern|snake river|alligator weed|beaver dam road|beaver dam pond|town seal|sealant|sealed|sealing|herring gull|alligator river refuge|fox creek|fox and tr…
EEP	Fauna	Fauna Community	near	animal|fauna|wildlife|bird|fowl|raptor|falcon|osprey|hawk|eagle| owl |waterfowl|duck|geese|goose|heron|ibis|spoonbill|mallard| egret |songbird|sparrow|warbler|wrens|blackbird|thrush|plover|rookery|rookerie|mammal|seal| otter |deer|beaver| elk |moose|cougar|panther|fox|muskrat|raccoon|nutria|bobcat|lynx|marten|coyote|reptile|alligator|snake|python|cottonmouth|amphibian|frog|salamander| newt |turtl…
EEP	Fauna	Edible Fauna	include	edible| eat | ate |food|delicious|subsist|sustenance|forage|meat	hunt.*meat|meat.*hunt|trap.*meat|meat.*trap|shoot.*hunt|hunt.*shoot|hunt.*kill|kill.*hunt|hunt.*meat|trap.*meat|meat.*hunt|meat.*trap|hunt.*edible|trap.*edible|edible.*hunt|edible.*trap|hunt.*consumpt|trap.*consumpt|consumpt.*hunt|consumpt.*trap|hunt.*eaten|trap.*eaten|eaten.*hunt|eaten.*trap|subsist.*hunt|hunt.*subsist|trap.*subsist|subsist.*trap|hunting|hunter|trapping season|hunts	meat	fish |seafood|shellfish|salmon|shrimp|oyster|crab|lobster|mullet|mussel|bass|herring|flounder| clam |geoduck|mollusk|gaper	seafood|fishery|fisheries|angler|angling|shellfish garden|oyster garden|shellfish farm|oyster farm|fishing|fisherman|fishermen	wildstock|wild.*stock|stock.*wild|wild.*catch|catch.*wild|wild.*caught|caught.*wild	food .*human|human.*food|food .*people|people.*food|forage.*human|human.*forage|forage .*people|people.*forage
EEP	Fauna	Edible Fauna	exclude	nonedible|scavenger hunt|fish.*trap|trap.*fish|agency|askin|pickerel|by-product|byproduct|by product|chid|entrap|strap|trap.*gas|gas.*trap|sediment.*trap|contam.*trap|nutrient.*trap|pollut.*trap|trap.*contam|trap.*nutrient|trap.*pollut|sand.*trap|trap.*sand|trap.*sediment|litter trap|fish trap|especial|power.*generation|electric.*generation|generation plant|generation facilit|laboratory observ|fi…	nonedible|scavenger hunt|fish.*trap|trap.*fish|agency|askin|pickerel|by-product|byproduct|by product|chid|entrap|strap|trap.*gas|gas.*trap|sediment.*trap|contam.*trap|nutrient.*trap|pollut.*trap|trap.*contam|trap.*nutrient|trap.*pollut|sand.*trap|trap.*sand|trap.*sediment|litter trap|fish trap|especial|power.*generation|electric.*generation|generation plant|generation facilit|laboratory observ|fi…	toad flax|toadflax|goosefoot|snowbird|geoduck|domestic animal|production of animal|production of plants and animal|turtle cove|turtleback|animal production|insecticide|otter point creek|bullfrog creek|buttercup|buttermilk|butterwort|abutter|butter clam|rookerybay|rookery bay|batbing|bato|batk|tbat|batsto|bata|abat|bate|bath|bati|batu|blackbird creek|dairy|c-hawk|hawken|redbug|lowl|batr|muskin|sea…	oyster shells|ambassador|salmon falls|indig|reclam|clami|horseshoe crab|oystercatcher|agency|askin|pickerel|by-product|byproduct|by product|chid|entrap|strap|sediment.*trap|contam.*trap|nutrient.*trap|pollut.*trap|trap.*contam|trap.*nutrient|trap.*pollut|sand.*trap|trap.*sand|trap.*sediment|litter trap|especial|power.*generation|electric.*generation|generation plant|generation facilit|laboratory …	fisherman island|fisherman.*inlet|national marine fisheries service|oystercatcher	livestock|wildlife|wild animal|spike|clami|herring river|herring creek|bass river|herring cove|duck harbor|duck creek|swan street|salmonberry|toms river|herring gull|salmon creek|salmon highway|salmon drift watershed council|salmon river|oystercatcher	fish.*trap|trap.*fish|agency|beautyberry|food web|foodweb|food chain|foodchain|birdseye|national wildlife refuge|oyste bird|forage fish|forage habitat|forage crop|toad flax|toadflax|goosefoot|snowbird|geoduck|domestic animal|production of animal|production of plants and animal|turtle cove|turtleback|animal production|insecticide|otter point creek|bullfrog creek|buttercup|buttermilk|butterwort|abu…
EEP	Fauna	Edible Fauna	near	animal|fauna|wildlife|mammal|bird|reptile|amphibian| fish |insect|fowl|duck|geese|pidgeon|pigeon|turtle|tortoise|seal|manatee| otter |deer|goose|alligator|frog| toad|nutria|raccoon| hogs|rabbit|beaver|shellfish|snake|squirrel|possum|cottontail	edible|food|harvest|delicious|subsist|sustenance	wild|harvest|raptor|fauna|animal|mammal|wildlife|bird| owl |fowl|duck|sparrow|warbler|plover|falcon|osprey|hawk|eagle|pelican|geese|pidgeon|pigeon|turtle|tortoise|seal|manatee| otter |dragonfl|insect|beetle|entomolo| bug | bugs |deer|waterfowl|duck|goose|reptile|alligator|amphibian|salamander|frog| toad|skink|bat|nutria|raccoon|hogs|rabbit|beaver|rookery|rookeries|butter|marine.*species|terrestri…	harvest|collect|gather|catch|dig|nets|traps|trap|angler|fisherman|fishing|clamming|crabbing		fish |seafood|salmon|shrimp|oyster|crab|lobster|mullet|mussel|bass|herring|flounder| clam |geoduck|river|stream	animal|fauna|wildlife|mammal|bird|reptile|amphibian| fish |insect|fowl|duck|geese|pidgeon|pigeon|turtle|tortoise|seal|manatee| otter |deer|goose|alligator|frog| toad|nutria|raccoon| hogs|rabbit|beaver|shellfish|snake|possum|squirrel|turkey
EEP	Fauna	Fauna for fur_hide_or trophy	include	pelt|tanning|tannery| skins | skinning|hide| fur | furs |fur-bear|fur bear|furbear|trophy|stuffed|mounted|prize	pelt|tanning|tannery	skins | skinning|hide| fur | furs |fur-bear|fur bear|furbear|feather	catch and release
EEP	Fauna	Fauna for fur_hide_or trophy	exclude	scavenger hunt|fish.*trap|trap.*fish|agency|askin|pickerel|by-product|byproduct|by product|chid|entrap|strap|trap.*gas|gas.*trap|sediment.*trap|contam.*trap|nutrient.*trap|pollut.*trap|trap.*contam|trap.*nutrient|trap.*pollut|sand.*trap|trap.*sand|trap.*sediment|litter trap|fish trap|especial|power.*generation|electric.*generation|generation plant|generation facilit|laboratory observ|field observ…	scavenger hunt|fish.*trap|trap.*fish|agency|askin|pickerel|by-product|byproduct|by product|chid|entrap|strap|trap.*gas|gas.*trap|sediment.*trap|contam.*trap|nutrient.*trap|pollut.*trap|trap.*contam|trap.*nutrient|trap.*pollut|sand.*trap|trap.*sand|trap.*sediment|litter trap|fish trap|especial|power.*generation|electric.*generation|generation plant|generation facilit|laboratory observ|field observ…	scavenger hunt|fish.*trap|trap.*fish|agency|askin|pickerel|by-product|byproduct|by product|chid|entrap|strap|trap.*gas|gas.*trap|sediment.*trap|contam.*trap|nutrient.*trap|pollut.*trap|trap.*contam|trap.*nutrient|trap.*pollut|sand.*trap|trap.*sand|trap.*sediment|litter trap|fish trap|especial|power.*generation|electric.*generation|generation plant|generation facilit|laboratory observ|field observ…	salmonberry|salmon creek|salmon highway|salmon drift watershed council|salmon river
EEP	Fauna	Fauna for fur_hide_or trophy	near	animal|fauna|wildlife|mammal|bird|reptile|amphibian| fish |insect|bear|beaver|fox| otter |muskrat|raccoon|deer| elk |moose| fish |salmon|sturgeon|bass|deer|bear|cougar|duck|bird|goose|alligator|rabbit		exploit|hunt|trap|harvest|company|corporation|trade|subsist	fish |salmon|trout
EEP	Fauna	Bait fauna	include	bait
EEP	Fauna	Bait fauna	exclude
EEP	Fauna	Bait fauna	near
EEP	Fauna	Medicinal Fauna	include	medicin|medical|healing|ailment|disease.*people|people.*disease|human.*disease|disease.*human|vaccine|pharmaceutic
EEP	Fauna	Medicinal Fauna	exclude	poisonous|toxic|venomous|toad flax|toadflax|toadflax|goosefoot|snowbird|geoduck|domestic animal|production of animal|production of plants and animal|turtle cove|turtleback|animal production|insecticide|otter point creek|bullfrog creek|buttercup|buttermilk|butterwort|abutter|butter clam|rookerybay|rookery bay|batbing|bato|batk|tbat|batsto|bata|abat|bate|bath|bati|batu|blackbird creek|dairy|c-hawk|…
EEP	Fauna	Medicinal Fauna	near	animal|fauna|wildlife|bird|fowl|raptor|falcon|osprey|hawk|eagle| owl |waterfowl|duck|geese|goose|heron|ibis|spoonbill|mallard| egret |songbird|sparrow|warbler|wrens|blackbird|thrush|plover|rookery|rookerie|mammal|seal| otter |deer|beaver| elk |moose|cougar|panther|fox|muskrat|raccoon|nutria|bobcat|lynx|marten|coyote|reptile|alligator|snake|python|cottonmouth|amphibian|frog|salamander| newt |turtl…
EEP	Fauna	Keystone Fauna	include	keystone|important species|vital species|keystone.*species|ecolog.*engineer|ecosyst.*engineer|foundation.*species	bioturbation
EEP	Fauna	Keystone Fauna	exclude	toad flax|toadflax|goosefoot|snowbird|geoduck|domestic animal|production of animal|production of plants and animal|turtle cove|turtleback|animal production|insecticide|otter point creek|bullfrog creek|buttercup|buttermilk|butterwort|abutter|butter clam|rookerybay|rookery bay|batbing|bato|batk|tbat|batsto|bata|abat|bate|bath|bati|batu|blackbird creek|dairy|c-hawk|hawken|redbug|lowl|batr|muskin|sea…	plants|grasses|mangrove|reed|tree|spruce|cypress|maple|beaver dam road|beaver dam pond
EEP	Fauna	Keystone Fauna	near	animal|fauna|wildlife|bird|fowl|raptor|falcon|osprey|hawk|eagle| owl |waterfowl|duck|geese|goose|heron|ibis|spoonbill|mallard| egret |songbird|sparrow|warbler|wrens|blackbird|thrush|plover|rookery|rookerie|mammal|seal| otter |deer|beaver| elk |moose|cougar|panther|fox|muskrat|raccoon|nutria|bobcat|lynx|marten|coyote|reptile|alligator|snake|python|cottonmouth|amphibian|frog|salamander| newt |turtl…	shrimp|beaver|nutria
EEP	Fauna	Charismatic Fauna	include	aesthetic|allure|alluring|appeal|amaze|amazing|ameniable|amenit|appreciat|asset|attract|beaut|charisma|desired|desirable|enhance|enhancing|enjoy|encounter|extraordinary|excellent|favor|favorable|feel|hallmark|inspir|interest|majestic|mystique|observ|pleasant|popular|sight|spectacular|stunning|view|watch|wonder| wild |pick	bird|fowl|raptor|falcon|osprey|hawk|eagle| owl |waterfowl|duck|geese|goose|heron|ibis|spoonbill|mallard| egret |songbird|sparrow|warbler|wrens|blackbird|thrush|plover|rookery|rookerie	reptile|alligator|snake|python|cottonmouth|amphibian|frog| toad| newt |salamander	insect|dragonfly|damselfly|beetle| bee | bees|honey-bee| moth | moths|butterfly|butterflies	fish |salmon|coho|chinook|minnow|silverside|herring|bass|tarpon|snook|horseshoe crab
EEP	Fauna	Charismatic Fauna	exclude	toad flax|toadflax|goosefoot|snowbird|geoduck|domestic animal|production of animal|production of plants and animal|turtle cove|turtleback|animal production|insecticide|otter point creek|bullfrog creek|buttercup|buttermilk|butterwort|abutter|butter clam|rookerybay|rookery bay|batbing|bato|batk|tbat|batsto|bata|abat|bate|bath|bati|batu|blackbird creek|dairy|c-hawk|hawken|redbug|lowl|batr|muskin|sea…	toad flax|toadflax|goosefoot|snowbird|geoduck|domestic animal|production of animal|production of plants and animal|turtle cove|turtleback|animal production|insecticide|otter point creek|bullfrog creek|buttercup|buttermilk|butterwort|abutter|butter clam|rookerybay|rookery bay|batbing|bato|batk|tbat|batsto|bata|abat|bate|bath|bati|batu|blackbird creek|dairy|c-hawk|hawken|redbug|lowl|batr|muskin|sea…	toad flax|toadflax|goosefoot|snowbird|geoduck|domestic animal|production of animal|production of plants and animal|turtle cove|turtleback|animal production|insecticide|otter point creek|bullfrog creek|buttercup|buttermilk|butterwort|abutter|butter clam|rookerybay|rookery bay|batbing|bato|batk|tbat|batsto|bata|abat|bate|bath|bati|batu|blackbird creek|dairy|c-hawk|hawken|redbug|lowl|batr|muskin|sea…	toad flax|toadflax|goosefoot|snowbird|geoduck|domestic animal|production of animal|production of plants and animal|turtle cove|turtleback|animal production|insecticide|otter point creek|bullfrog creek|buttercup|buttermilk|butterwort|abutter|butter clam|rookerybay|rookery bay|batbing|bato|batk|tbat|batsto|bata|abat|bate|bath|bati|batu|blackbird creek|dairy|c-hawk|hawken|redbug|lowl|batr|muskin|sea…	toad flax|toadflax|goosefoot|snowbird|geoduck|domestic animal|production of animal|production of plants and animal|turtle cove|turtleback|animal production|insecticide|otter point creek|bullfrog creek|buttercup|buttermilk|butterwort|abutter|butter clam|rookerybay|rookery bay|batbing|bato|batk|tbat|batsto|bata|abat|bate|bath|bati|batu|blackbird creek|dairy|c-hawk|hawken|redbug|lowl|batr|muskin|sea…
EEP	Fauna	Charismatic Fauna	near	animal|fauna|wildlife|bird|fowl|raptor|falcon|osprey|hawk|eagle| owl |waterfowl|duck|geese|goose|heron|ibis|spoonbill|mallard| egret |songbird|sparrow|warbler|wrens|blackbird|thrush|plover|rookery|rookerie|mammal|seal| otter |deer|beaver| elk |moose|cougar|panther|fox|muskrat|raccoon|nutria|bobcat|lynx|marten|coyote|reptile|alligator|snake|python|cottonmouth|amphibian|frog|salamander| newt |turtl…	aesthetic|allure|alluring|appeal|amaze|amazing|ameniable|amenit|appreciat|asset|attract|beaut|charisma|desired|desirable|enhance|enhancing|enjoy|encounter|extraordinary|excellent|favor|favorable|feel|hallmark|inspir|interest|majestic|mystique|observ|pleasant|popular|sight|spectacular|stunning|view|watch|wonder	aesthetic|allure|alluring|appeal|amaze|amazing|ameniable|amenit|appreciat|asset|attract|beaut|charisma|desired|desirable|enhance|enhancing|enjoy|encounter|extraordinary|excellent|favor|favorable|feel|hallmark|inspir|interest|majestic|mystique|observ|pleasant|popular|sight|spectacular|stunning|view|watch|wonder	aesthetic|allure|alluring|appeal|amaze|amazing|ameniable|amenit|appreciat|asset|attract|beaut|charisma|desired|desirable|enhance|enhancing|enjoy|encounter|extraordinary|excellent|favor|favorable|feel|hallmark|inspir|interest|majestic|mystique|observ|pleasant|popular|sight|spectacular|stunning|view|watch|wonder	aesthetic|allure|alluring|appeal|amaze|amazing|ameniable|amenit|appreciat|asset|attract|beaut|charisma|desired|desirable|enhance|enhancing|enjoy|encounter|extraordinary|excellent|favor|favorable|feel|hallmark|inspir|interest|majestic|mystique|observ|pleasant|popular|sight|spectacular|stunning|view|watch|wonder
EEP	Fauna	Rare Fauna	include	rare|endangered|red list|endemic|species of concern|species of special concern|species of management concern|endangered.*species|threatened.*species|species.*endangered|species.*threatened|threatened|federally listed	critical wildlife
EEP	Fauna	Rare Fauna	exclude	toad flax|toadflax|goosefoot|snowbird|geoduck|domestic animal|production of animal|production of plants and animal|turtle cove|turtleback|animal production|insecticide|otter point creek|bullfrog creek|buttercup|buttermilk|butterwort|abutter|butter clam|rookerybay|rookery bay|batbing|bato|batk|tbat|batsto|bata|abat|bate|bath|bati|batu|blackbird creek|dairy|c-hawk|hawken|redbug|lowl|batr|muskin|sea…
EEP	Fauna	Rare Fauna	near	animal|fauna|wildlife|bird|fowl|raptor|falcon|osprey|hawk|eagle| owl |waterfowl|duck|geese|goose|heron|ibis|spoonbill|mallard| egret |songbird|sparrow|warbler|wrens|blackbird|thrush|plover|rookery|rookerie|mammal|seal| otter |deer|beaver| elk |moose|cougar|panther|fox|muskrat|raccoon|nutria|bobcat|lynx|marten|coyote|reptile|alligator|snake|python|cottonmouth|amphibian|frog|salamander| newt |turtl…
EEP	Fauna	Pollinating Fauna	include	pollinat	honeybee|honey-bee| bees| bee | moth | moths|butterfly|butterflies|hummingbird|bat	pollinator
EEP	Fauna	Pollinating Fauna	exclude	ssc|lack.*educat|pollen history|cross-pollin	chobee|been|beef|beetle|tombigbee|okeechobee|beeplant|ssc|lack.*educat|beet|bee county|bee education|document|ssc|lack.*educat|microp|batbing|bato|batk|tbat|batsto|bata|abat|bate|bath|bati|batu|batr|combat|butterfish|butterfly orchid|batt|buttercup|butter clam|butterwort|abutter|buttermilk|butterfly-pea|bat star|butterfly fish|butterweed|hummingbird flower|beec|beev|bee fly|beea|necropsy|outcrop
EEP	Fauna	Pollinating Fauna	near	bee | bees|honey-bee| moth | moths|butterfly|butterflies|hummingbird|bat	flower|flora|crop|garden|farm|agricultur|native plant
EEP	Fauna	Commercially Important Fauna	include	business|buy|commercial|commodit|company|corporation|econom|exploit|extract|goods|income|industry|job|market| product |profession|profit|promote|promotion|resource| sell| sale|trade|trading
EEP	Fauna	Commercially Important Fauna	exclude	toad flax|toadflax|goosefoot|snowbird|geoduck|domestic animal|production of animal|production of plants and animal|turtle cove|turtleback|animal production|insecticide|otter point creek|bullfrog creek|buttercup|buttermilk|butterwort|abutter|butter clam|rookerybay|rookery bay|batbing|bato|batk|tbat|batsto|bata|abat|bate|bath|bati|batu|blackbird creek|dairy|c-hawk|hawken|redbug|lowl|batr|muskin|sea…
EEP	Fauna	Commercially Important Fauna	near	animal|fauna|wildlife|bird|fowl|raptor|falcon|osprey|hawk|eagle| owl |waterfowl|duck|geese|goose|heron|ibis|spoonbill|mallard| egret |songbird|sparrow|warbler|wrens|blackbird|thrush|plover|rookery|rookerie|mammal|seal| otter |deer|beaver| elk |moose|cougar|panther|fox|muskrat|raccoon|nutria|bobcat|lynx|marten|coyote|reptile|alligator|snake|python|cottonmouth|amphibian|frog|salamander| newt |turtl…
EEP	Fauna	Spiritually_Culturally Important Fauna	include	spiritual|cultural|festiv|ceremon|ritual|cherish|tradition|legacy|tribal|tribe|heritage|steward|indian population|indian people|indigenous.*people|indigenous.*person|native.*person|native american	fauna|animal|wildlife	bird|fowl|raptor|falcon|osprey|hawk|eagle| owl |waterfowl|duck|geese|goose|heron|ibis|spoonbill|mallard| egret |songbird|sparrow|warbler|wrens|blackbird|thrush|plover|rookery|rookeries	mammal|seal| otter |deer|beaver| elk |moose|cougar|panther|fox|muskrat|raccoon|nutria|bobcat|lynx|marten|coyote|rabbit	reptile|alligator|snake|python|cottonmouth|amphibian|frog| toad| newt |salamander	insect|dragonfly|damselfly|beetle| bee | bees|honey-bee| moth | moths|butterfly|butterflies	fish |salmon|coho|chinook|minnow|silverside|herring|bass|tarpon|snook|horseshoe crab
EEP	Fauna	Spiritually_Culturally Important Fauna	exclude	toad flax|toadflax|goosefoot|snowbird|geoduck|domestic animal|production of animal|production of plants and animal|turtle cove|turtleback|animal production|insecticide|otter point creek|bullfrog creek|buttercup|buttermilk|butterwort|abutter|butter clam|rookerybay|rookery bay|batbing|bato|batk|tbat|batsto|bata|abat|bate|bath|bati|batu|blackbird creek|dairy|c-hawk|hawken|redbug|lowl|batr|muskin|sea…	toad flax|toadflax|goosefoot|snowbird|geoduck|domestic animal|production of animal|production of plants and animal|turtle cove|turtleback|animal production|insecticide|otter point creek|bullfrog creek|buttercup|buttermilk|butterwort|abutter|butter clam|rookerybay|rookery bay|batbing|bato|batk|tbat|batsto|bata|abat|bate|bath|bati|batu|blackbird creek|dairy|c-hawk|hawken|redbug|lowl|batr|muskin|sea…	toad flax|toadflax|goosefoot|snowbird|geoduck|domestic animal|production of animal|production of plants and animal|turtle cove|turtleback|animal production|insecticide|otter point creek|bullfrog creek|buttercup|buttermilk|butterwort|abutter|butter clam|rookerybay|rookery bay|batbing|bato|batk|tbat|batsto|bata|abat|bate|bath|bati|batu|blackbird creek|dairy|c-hawk|hawken|redbug|lowl|batr|muskin|sea…	toad flax|toadflax|goosefoot|snowbird|geoduck|domestic animal|production of animal|production of plants and animal|turtle cove|turtleback|animal production|insecticide|otter point creek|bullfrog creek|buttercup|buttermilk|butterwort|abutter|butter clam|rookerybay|rookery bay|batbing|bato|batk|tbat|batsto|bata|abat|bate|bath|bati|batu|blackbird creek|dairy|c-hawk|hawken|redbug|lowl|batr|muskin|sea…	toad flax|toadflax|goosefoot|snowbird|geoduck|domestic animal|production of animal|production of plants and animal|turtle cove|turtleback|animal production|insecticide|otter point creek|bullfrog creek|buttercup|buttermilk|butterwort|abutter|butter clam|rookerybay|rookery bay|batbing|bato|batk|tbat|batsto|bata|abat|bate|bath|bati|batu|blackbird creek|dairy|c-hawk|hawken|redbug|lowl|batr|muskin|sea…	toad flax|toadflax|goosefoot|snowbird|geoduck|domestic animal|production of animal|production of plants and animal|turtle cove|turtleback|animal production|insecticide|otter point creek|bullfrog creek|buttercup|buttermilk|butterwort|abutter|butter clam|rookerybay|rookery bay|batbing|bato|batk|tbat|batsto|bata|abat|bate|bath|bati|batu|blackbird creek|dairy|c-hawk|hawken|redbug|lowl|batr|muskin|sea…	toad flax|toadflax|goosefoot|snowbird|geoduck|domestic animal|production of animal|production of plants and animal|turtle cove|turtleback|animal production|insecticide|otter point creek|bullfrog creek|buttercup|buttermilk|butterwort|abutter|butter clam|rookerybay|rookery bay|batbing|bato|batk|tbat|batsto|bata|abat|bate|bath|bati|batu|blackbird creek|dairy|c-hawk|hawken|redbug|lowl|batr|muskin|sea…
EEP	Fauna	Spiritually_Culturally Important Fauna	near	animal|fauna|wildlife|bird|fowl|raptor|falcon|osprey|hawk|eagle| owl |waterfowl|duck|geese|goose|heron|ibis|spoonbill|mallard| egret |songbird|sparrow|warbler|wrens|blackbird|thrush|plover|rookery|rookerie|mammal|seal| otter |deer|beaver| elk |moose|cougar|panther|fox|muskrat|raccoon|nutria|bobcat|lynx|marten|coyote|reptile|alligator|snake|python|cottonmouth|amphibian|frog|salamander| newt |turtl…	spiritual|cultural|festiv|ceremon|ritual|cherish|tradition|legacy|tribal|tribe|heritage|indian population|indian people|indigenous.*people|indigenous.*person|native.*person|native american	spiritual|cultural|festiv|ceremon|ritual|cherish|tradition|legacy|tribal|tribe|heritage|indian population|indian people|indigenous.*people|indigenous.*person|native.*person|native american	spiritual|cultural|festiv|ceremon|ritual|cherish|tradition|legacy|tribal|tribe|heritage|indian population|indian people|indigenous.*people|indigenous.*person|native.*person|native american	spiritual|cultural|festiv|ceremon|ritual|cherish|tradition|legacy|tribal|tribe|heritage|indian population|indian people|indigenous.*people|indigenous.*person|native.*person|native american	spiritual|cultural|festiv|ceremon|ritual|cherish|tradition|legacy|tribal|tribe|heritage|indian population|indian people|indigenous.*people|indigenous.*person|native.*person|native american	spiritual|cultural|festiv|ceremon|ritual|cherish|tradition|legacy|tribal|tribe|heritage|indian population|indian people|indigenous.*people|indigenous.*person|native.*person|native american
EEP	Fauna	Pest Fauna	include	pest|invasive|non-native|not native|pest predator|depredator|nuisance	biologic control|biocontrol|biological control|natural population control|natural check|natural control|biologic means|biological means|biologic methods|biological methods|natural pathogen control|natural pest control|natural disease control|depredator|pest predator|natural insect control|natural pest control|agricultural environmental management|IPM|integrated pest management
EEP	Fauna	Pest Fauna	exclude	toad flax|toadflax|goosefoot|snowbird|geoduck|domestic animal|production of animal|production of plants and animal|turtle cove|turtleback|animal production|insecticide|otter point creek|bullfrog creek|buttercup|buttermilk|butterwort|abutter|butter clam|rookerybay|rookery bay|batbing|bato|batk|tbat|batsto|bata|abat|bate|bath|bati|batu|blackbird creek|dairy|c-hawk|hawken|redbug|lowl|batr|muskin|sea…	uipm|hipm|toad flax|toadflax|goosefoot|snowbird|geoduck|domestic animal|production of animal|production of plants and animal|turtle cove|turtleback|animal production|insecticide|otter point creek|bullfrog creek|buttercup|buttermilk|butterwort|abutter|butter clam|rookerybay|rookery bay|batbing|bato|batk|tbat|batsto|bata|abat|bate|bath|bati|batu|blackbird creek|dairy|c-hawk|hawken|redbug|lowl|batr|…
EEP	Fauna	Pest Fauna	near	animal|fauna|wildlife|bird|fowl|raptor|falcon|osprey|hawk|eagle| owl |waterfowl|duck|geese|goose|heron|ibis|spoonbill|mallard| egret |songbird|sparrow|warbler|wrens|blackbird|thrush|plover|rookery|rookerie|mammal|seal| otter |deer|beaver| elk |moose|cougar|panther|fox|muskrat|raccoon|nutria|bobcat|lynx|marten|coyote|reptile|alligator|snake|python|cottonmouth|amphibian|frog|salamander| newt |turtl…	animal|fauna|wildlife|bird|fowl|raptor|falcon|osprey|hawk|eagle| owl |waterfowl|duck|geese|goose|heron|ibis|spoonbill|mallard| egret |songbird|sparrow|warbler|wrens|blackbird|thrush|plover|rookery|rookerie|mammal|seal| otter |deer|beaver| elk |moose|cougar|panther|fox|muskrat|raccoon|nutria|rabbit|bobcat|lynx|marten|coyote|reptile|alligator|snake|python|cottonmouth|amphibian|frog|salamander| newt…
EEP	Soil	Soil	include	accomodat|activit|aesthetic|allure|appeal|alluring|amaze|amazing|ameniable|amenit|appreciat|artisan|artist| art | arts |attract|beaut|beneficial|benefit|bequest|business|buy| care| caring|charisma|cherish|children|comfort|concern|conserv|corporation|critical|dealer|delicious|desired|desirable|destination|diversity|econom|educat|encourag|enhance|enhancing|enjoy|encounter|enthusiast|excellent|exper…
EEP	Soil	Soil	exclude	infertile|unproductive|poor|disturbed|anaerobic|drainfield|drainage basin|drainage ditch|retention|buffer|infiltration|runoff|sedimentation|categor|implement|problem|impact|particle|challenge|action|manage|goal|assess|department|water.*quality|agency|inhibit|monitor|load|treatment|data|mandat|develop|act|test|compound|criteria|measur|inform|filter|tmdl|metal|regulat|hydrocarbon|radiocarbon|constr…
EEP	Soil	Soil	near	sediment|soil|dirt|mud|clay|loam| stones |rocks| peat |substrate
EEP	Soil	Soil Quantity	include	quantity|bountiful|bounty|commercial|commodities|commodity|goods|resource|option value|asset|rare|resource|restor|sale|save|saving|sell|collect|create|construct|produce| product |accretion|accrete|erosion|erode|stability|stabiliz|stable| plenty|plentiful|abundant
EEP	Soil	Soil Quantity	exclude	infertile|unproductive|poor|disturbed|anaerobic|drainfield|drainage basin|drainage ditch|retention|buffer|infiltration|runoff|sedimentation|categor|implement|problem|impact|particle|challenge|action|manage|goal|assess|department|water.*quality|agency|inhibit|monitor|load|treatment|data|mandat|develop|act|test|activit|compound|criteria|measur|inform|filter|tmdl|metal|regulat|hydrocarbon|radiocarbo…
EEP	Soil	Soil Quantity	near	sediment|soil|dirt|mud|clay|loam| stones | peat |rocks
EEP	Soil	Soil Quality	include	quality|decompos|replenish|productivity|microbe|microorg|fung|rich|health|nutrient|fertile|drainage|suitable|suitability|moisture|capacity|arable|condition|good|prime|well-drained|formation|organic|concentration	promot.*research|research.*promot|promot.*science|science.*promot|science.*potential|potential.*science|research.*potential|potential.*research|science.*purpose|purpose.*science|research.*purpose|purpose.*research|improve.*knowledge|enhance.*knowledge|knowledge.*improve|knowledge.*enhance|improve.*learn|enhance.*learn|learn.*improve|learn.*enhance
EEP	Soil	Soil Quality	exclude	infertile|unproductive|poor|disturbed|anaerobic|drainfield|drainage basin|drainage ditch|retention|buffer|infiltration|runoff|sedimentation|categor|implement|problem|impact|particle|challenge|action|manage|goal|assess|department|water.*quality|agency|inhibit|monitor|load|treatment|data|mandat|develop|act|test|activit|compound|criteria|measur|inform|filter|tmdl|metal|regulat|hydrocarbon|radiocarbo…	infertile|unproductive|poor|disturbed|anaerobic|drainfield|drainage basin|drainage ditch|retention|buffer|infiltration|runoff|sedimentation|categor|implement|problem|impact|particle|challenge|action|manage|goal|assess|department|water.*quality|agency|inhibit|monitor|load|treatment|data|mandat|develop|act|test|activit|compound|criteria|measur|inform|filter|tmdl|metal|regulat|hydrocarbon|radiocarbo…
EEP	Soil	Soil Quality	near	sediment|soil|dirt|mud|clay|loam| stones | peat |rocks	sediment|soil|dirt|mud|clay|loam| stones | peat |rocks
EEP	Soil	Substrate Quantity	include	construct|benefit|nourish|replenish|stability|stable|stabiliz|econom|produce|create|restor|base|support|suitable|deposit|erode|erosion|formation	important|vital|importance|essential|critical|substrate|creat.*surface|provid.*surface
EEP	Soil	Substrate Quantity	exclude	artificial substrate|substrateg|surface water|surface flow|surface -water|substrateg|change|priority|municipalit|www|contaminat|pollut|toxic|toxin|salamander|claytonia|permit|report|goal|study|dredg|monitor|metal|identif|project|inform|creek|construction|sewer|waste|marblemount|durante.*park|dnrec|boring|barrier.*island|manag.*plan|identify|15.*visitor|groundwater|water suppl|nursery|spawn|backgr…	mudboat|mud mountain
EEP	Soil	Substrate Quantity	near	substrate|creat.*surface|provid.*surface	muck.*estuar|estuar.*muck|muck.*wetland|wetland.*muck|mud|clay|loam| stones |rocks
EEP	Soil	Substrate Quality	include	quality|productivity|rich|health|nutrient|fertile|drainage|suitable|suitability|moisture|capacity|arable|condition|good|prime|productive|well-drained|organic|habitable
EEP	Soil	Substrate Quality	exclude	artificial substrate|substrateg|surface water|surface flow|surface-water|substrateg|change|priority|municipalit|www|contaminat|pollut|toxic|toxin|salamander|claytonia|permit|report|goal|study|dredg|monitor|metal|identif|project|inform|creek|construction|sewer|waste|marblemount|durante.*park|dnrec|boring|barrier.*island|manag.*plan|identify|15.*visitor|groundwater|water suppl|nursery|spawn|backgro…
EEP	Soil	Substrate Quality	near	substrate|creat.*surface|provid.*surface
EEP	Water	Water	include	accomodat|activit|aesthetic|allure|appeal|alluring|amaze|amazing|ameniable|amenit|appreciat|artisan|artist| art | arts |attract|beaut|beneficial|benefit|bequest|business|buy| care| caring|charisma|cherish|children|comfort|concern|conserv|corporation|critical|dealer|delicious|desired|desirable|destination|diversity|econom|educat|encourag|enhance|enhancing|enjoy|encounter|enthusiast|excellent|exper…	protect|conserv|preserv
EEP	Water	Water	exclude	agency|pickerel|by-product|byproduct|by product|especial|laboratory observ|field observ|lab observ|special issue|meadow beauty|river beauty|beautiful jacob|spring beauty|careful|exotic|extrapolat|askin|pickerel|invasive species|iskin|nuisance species|overview|in view of|over-view|over- view|provid.* no clue|provid.* notice|provid.* basis|provid.*expertise|rarely|temperature value|biomass value|no…	sundew|stormwater|storm water|storm-water|watershed|waterfowl|flood water|floodwater|flood-water|wastewater|waste water|waste-water|water snake|freshwater catfish|water lily|water hyacinth|freshwater drum|watermilfoil|water-hyssop|water shield|water lettuce|water pepper|water primrose|saltwater fish|watermen|waterfront|freshwater marsh|freshwater bayou|freshwater tidal wetland|shell water bottom|…
EEP	Water	Water	near	water	water
EEP	Water	Water Quality	include	quality|replenish|health|suitable|suitability|condition|good|prime	promot.*research|research.*promot|promot.*science|science.*promot|science.*potential|potential.*science|research.*potential|potential.*research|science.*purpose|purpose.*science|research.*purpose|purpose.*research|improve.*knowledge|enhance.*knowledge|knowledge.*improve|knowledge.*enhance|improve.*learn|enhance.*learn|learn.*improve|learn.*enhance	compliance|compliant	discharge|emission|point source|dilute|dilution|TMDL|daily load|ballast|divert|dispos.*material|dispos.*waste|waste.*dispos|material.*dispos|dredg.*dispos|dispos.*dredg|dispos.*debris|debris.*dispos|place.*dredge|dredge.*place|placing.*dredg|dredg.*placing|pollution from|contamin.*load|pollut.*load|sediment.*load|dump.*dredg|dredg.*dump|effluent	dischar|pollut|waste|contaminant|effluent
EEP	Water	Water Quality	exclude	stormwater|storm water|storm-water|watershed|waterfowl|flood water|floodwater|flood-water|wastewater|waste water|waste-water|agency|pickerel|by-product|byproduct|by product|especial|laboratory observ|field observ|lab observ|special issue|meadow beauty|river beauty|beautiful jacob|spring beauty|careful|exotic|extrapolat|askin|pickerel|invasive species|iskin|nuisance species|overview|in view of|ove…	stormwater|storm water|storm-water|watershed|waterfowl|flood water|floodwater|flood-water|wastewater|waste water|waste-water|water snake|freshwater catfish|water lily|water hyacinth|freshwater drum|watermilfoil|water-hyssop|water shield|water lettuce|water pepper|water primrose|saltwater fish|watermen|waterfront|freshwater marsh|freshwater bayou|freshwater tidal wetland|shell water bottom|water m…	stormwater|storm water|storm-water|watershed|waterfowl|flood water|floodwater|flood-water|wastewater|waste water|waste-water|water snake|freshwater catfish|water lily|water hyacinth|freshwater drum|watermilfoil|water-hyssop|water shield|water lettuce|water pepper|water primrose|saltwater fish|watermen|waterfront|freshwater marsh|freshwater bayou|freshwater tidal wetland|shell water bottom|water m…	stormwater|spoil deposition|sediment.*deposition|deposition.*sediment|stormwater|sample|evaluat|collectively|ordinance|demonstrat|data|monitor|watershed|waterfowl|division.*water|water supply paper|pumpout|pump out|stewardship|partnership|waterfowl|ownership|relationship|leadership|sponsorship|township|membership|shipped|rship|nship|zostera|sundew|toms river|water snake|freshwater catfish|water l…	sundew|stormwater|storm water|storm-water|watershed|waterfowl|flood water|floodwater|flood-water|wastewater|waste water|waste-water|water snake|freshwater catfish|water lily|water hyacinth|freshwater drum|watermilfoil|water-hyssop|water shield|water lettuce|water pepper|water primrose|saltwater fish|watermen|waterfront|freshwater marsh|freshwater bayou|freshwater tidal wetland|shell water bottom|…
EEP	Water	Water Quality	near	water|stream|river	water|water quality	wastewater|water.*discharge|discharge.*water	water|stream|river|creek|estuar| bay |marina|boat|ship|wetland	water.*receiv|receiv.*water|receiv.*bay|stream.*receiv|receiv.*stream|river.*receiv|receiv.*river
EEP	Water	Water Quantity	include	quantity|bountiful|bounty|commercial|commodities|commodity|goods|resource|option value|abundance|volume|asset|restor| sale|save|saving| sell|collect|create|construct|produce| product |capacity| plenty|plentiful|abundant	rain.*garden|rain.*barrel|store.*rain|rain.*store|storage.*rain|rain.*storage|cistern|water resource|water source|water use|water usage|water conservation|conserve water|water shortage|water storage|water demand|water quantity|rainwater harvest|water supply|water-supply|water demand|demand for water|demands for water|water well|supply well|municipal well|domestic well|private well|public well|art…	livestock.*water|water.*livestock|cattle.*water|cattle.*livestock	subsist|drink|intake	aquifer|hydro elect|hydroelect|hydro-elect|hydropower|hydro-power|dam.*electric|electric.*dam|cooling|energy.*dam|dam.*energy
EEP	Water	Water Quantity	exclude	stormwater|storm water|storm-water|watershed|waterfowl|flood water|floodwater|flood-water|wastewater|waste water|waste-water|agency|pickerel|by-product|byproduct|by product|especial|laboratory observ|field observ|lab observ|special issue|meadow beauty|river beauty|beautiful jacob|spring beauty|careful|exotic|extrapolat|askin|pickerel|invasive species|iskin|nuisance species|overview|in view of|ove…	swells|wells reserve|wells bay|town of wells|clean water act|sundew|drainage|restore|non-water	toms river|waterbird|water fowl|non-water	sample|evaluat|collectively|ordinance|disposal|demonstrat|data|monitor|waterfowl|permit|division.*water|water supply paper|sundew|stormwater|storm water|storm-water|waterfowl|flood water|floodwater|flood-water|wastewater|waste water|waste-water|toms river|water snake|freshwater catfish|water lily|water hyacinth|freshwater drum|watermilfoil|water-hyssop|water shield|water lettuce|water pepper|wate…	stormwater|storm water|storm-water|watershed|waterfowl|flood water|floodwater|flood-water|wastewater|waste water|waste-water|water snake|freshwater catfish|water lily|water hyacinth|freshwater drum|watermilfoil|water-hyssop|water shield|water lettuce|water pepper|water primrose|saltwater fish|watermen|waterfront|freshwater marsh|freshwater bayou|freshwater tidal wetland|shell water bottom|deep wa…
EEP	Water	Water Quantity	near	water		stream|river|creek|wetland	water|stream|river|creek|estuar| bay |reservoir	water
EEP	Water	Water Movement	include	movement|flow|current	navigat|navigab|transport	boat|ship|vessel|ferry|paddle	watercraft|jetski|kayak|canoe|boating|boater|shipping channel|stream channel	dam | dams |dike|levee	channel migration|tidal flow
EEP	Water	Water Movement	exclude	stormwater|storm water|storm-water|watershed|waterfowl|flood water|floodwater|flood-water|wastewater|waste water|waste-water|water snake|freshwater catfish|water lily|water hyacinth|freshwater drum|watermilfoil|water-hyssop|water shield|water lettuce|water pepper|water primrose|saltwater fish|watermen|waterfront|freshwater marsh|freshwater bayou|freshwater tidal wetland|shell water bottom|deep wa…	sundew|stormwater|storm water|storm-water|watershed|waterfowl|flood water|floodwater|flood-water|wastewater|waste water|waste-water|toms river|water snake|freshwater catfish|water lily|water hyacinth|freshwater drum|watermilfoil|water-hyssop|water shield|water lettuce|water pepper|water primrose|saltwater fish|watermen|waterfront|freshwater marsh|freshwater bayou|freshwater tidal wetland|shell wa…	stewardship|partnership|waterfowl|ownership|relationship|leadership|sponsorship|township|membership|shipped|rship|nship|support|harbor seal|new bedford harbor|bight|sundew|boat-tailed grackle|stormwater|storm water|storm-water|watershed|waterfowl|flood water|floodwater|flood-water|wastewater|waste water|waste-water|toms river|little egg harbor|water snake|freshwater catfish|water lily|water hyaci…	volcano
EEP	Water	Water Movement	near	water	water|stream|river|creek|channel|wetland	water|stream|river|creek|recreation|enjoy|moor|charter|tours|tourist|tourism|visit|cruise|port|harbor|access|traffic|channel|launch|reservoir
EEP	Atmosphere	Atmosphere	include	allure|appeal|alluring|amaze|amazing|appreciat|attract|beaut|beneficial|comfort|desired|desirable|destination|educat|enjoy|excellent|extraordinary|excellent|favorable|future|healthy|inspir|majestic|moderate|mild|mystique|pleasant|popular|quality.*life|relax|sight|special|spectacular|stunning|tours|tourist|tourism|visit|tourist|tourism|visit|treasure|valuable|valuing|well suited|well-suited|wonder…
EEP	Atmosphere	Atmosphere	exclude	rural.*atmosphere|changing.*climate|welcoming.*atmosphere|climate.*friendly|cloud.*berry|cloud.*water|water.*cloud|turbid|atmospheric science|NOAA|Atmospheric Administration|deposit|atmospheric fall|sky lupine|theat|train|winter salt marsh|rainwater kill|sundew|suny|fall river|freshwater spring|falls within|staff|summer camp|summer street|worker|sunken|program|session|employ|wave climate|winterin…
EEP	Atmosphere	Atmosphere	near	atmosphere|weather|climate|cloud|summer|fall|winter|spring|autumn|skies|sky|cloud|the sky|skyline|sky line|season
EEP	Atmosphere	Air Quality	include	quality|quality index|clean|pollut|fog|smog|breath|fresh|oxygen|carbon dioxide|helium|nitrogen|hydrogen	catcher|moisture|irrigat|garden|drink|hygiene	asthma|respiratory|health|safe|clean|breath|protect|restore|resource|quality|discharge|emission|load|carried|carry|point source|emission|reduce|reduction	relax|enjoy|special|unique|preserv|bounty|bountiful|benefit|recreat|valuable|tours|tourist|tourism|visit|value|restore|resource|protect|asset|special|amenit|desirable|pleasant|healthy|hallmark|recreat|opportunit|experienc|enjoy|relax|families|family|children|visitor|touris	specimen.*collect|sample.*collect|data.*collect|collect.*specimen|collect.*sample|collect.*data|specimen.*gather|sample.*gather|data.*gather|gather.*specimen|gather.*sample|gather.*data|collect.*research|research.*collect|scien.*collect|collect.*scien	emission.*to|release.*to|reduce|reduction|discharge.*to
EEP	Atmosphere	Air Quality	exclude	biofog|clean air act|weather|pair|fair|air yam|air plant|chair|questionnaire|airborne|affair|millionaire|dairy|act|airshed|National.*Weather.*Service|impair|repair|topic|federal|belleair|tmdl|air.*act|ciceet|prair|airport|clean.*air.*act|national.*air.*standard|airplane|airstrip|muck|regulat.*air|lair|Air Resource Specialist|Clean Air Bond|potato|dair|air force|www|Air Resources Lab|air rifle|air…	biofog|pollution|pollutant|climate|temperature|navigation|15.*visitor	cair|pair|fair|air yam|air plant|chair|questionnaire|airborne|affair|millionaire|dairy|act|airshed|National.*Weather.*Service|impair|repair|topic|federal|belleair|tmdl|air.*act|ciceet|prair|airport|clean.*air.*act|national.*air.*standard|airplane|airstrip|muck|regulat.*air|lair|Air Resource Specialist|Clean Air Bond|potato|dair|air force|www|Air Resources Lab|air rifle|air condition|airfield|airb…	cair|pair|fair|air yam|air plant|chair|questionnaire|airborne|affair|millionaire|dairy|act|airshed|National.*Weather.*Service|impair|repair|topic|federal|belleair|tmdl|air.*act|ciceet|prair|airport|clean.*air.*act|national.*air.*standard|airplane|airstrip|muck|regulat.*air|lair|Air Resource Specialist|Clean Air Bond|potato|dair|bair|air force|www|Air Resources Lab|air rifle|air condition|airfield…	cair|pair|fair|air yam|air plant|chair|questionnaire|airborne|affair|millionaire|dairy|act|airshed|National.*Weather.*Service|impair|repair|topic|federal|belleair|tmdl|air.*act|ciceet|prair|airport|clean.*air.*act|national.*air.*standard|airplane|airstrip|muck|regulat.*air|lair|Air Resource Specialist|Clean Air Bond|potato|dair|bair|air force|www|Air Resources Lab|air rifle|air condition|airfield…	deposition|load.*from|cooperative atmosphere|rural atmosphere|welcoming atmosphere|load.*of|atmospheric load|to.*bay
EEP	Atmosphere	Air Quality	near	air	fog	air	air	air	atmos
EEP	Atmosphere	Wind Strength_Speed	include	strength|speed|gust|power	boat|energy|electric|power|sport|turbine
EEP	Atmosphere	Wind Strength_Speed	exclude	turbine|energy|dwind|window|real.*time.*system|sediment|data|tax.*credit|bottle|defense|energy.*transfer|mooring|wind.*erosion|pollut|gis|wind.*biolog|absorb.*wind|overflow|stratification|stratify|circulate|mixing|circulation	windscreen|dwind|window|real.*time.*system|sediment|data|tax.*credit|bottle|defense|energy.*transfer|mooring|wind.*erosion|pollut|gis|wind.*biolog|absorb.*wind|overflow|xxxxxxx|15.*visitor|stratification|stratify|circulate|mixing|circulation
EEP	Atmosphere	Wind Strength_Speed	near	wind	wind
EEP	Atmosphere	Precipitation	include	allure|appeal|alluring|amaze|amazing|appreciat|attract|beaut|beneficial|comfort|desired|desirable|destination|educat|enjoy|excellent|extraordinary|excellent|favorable|future|healthy|inspir|majestic|moderate|mild|mystique|pleasant|popular|quality.*life|relax|sight|special|spectacular|stunning|tours|tourist|tourism|visit|tourist|tourism|visit|treasure|valuable|valuing|well suited|well-suited|wonder…	irrigat|farm|crop
EEP	Atmosphere	Precipitation	exclude	rural.*atmosphere|changing.*climate|welcoming.*atmosphere|climate.*friendly|cloud.*berry|cloud.*water|water.*cloud|turbid|atmospheric science|NOAA|Atmospheric Administration|deposit|atmospheric fall|sky lupine|theat|train|winter salt marsh|rainwater kill|sundew|suny|fall river|freshwater spring|falls within|staff|summer camp|summer street|summer street|worker|sunken|program|session|employ|wave cl…	necropsy|outcrop|moraine|rainwater basin
EEP	Atmosphere	Precipitation	near	precipitation| rain|rainfall| snow| hail	precipitation| rain|rainfall| snow|snowmelt| hail
EEP	Atmosphere	Sunlight	include	aesthetic|view|visual|scene|gaze|gazing|enjoy|special|unique|enjoy|view|beaut|observ|benefit|value|valuable|watch|aesthetic|relax|attract|sight|resource|asset|amenit|desirable|pleasant|healthy|experienc|warm	crop|farm|photosynth|energy|power	allure|appeal|alluring|amaze|amazing|appreciat|attract|beaut|beneficial|comfort|desired|desirable|destination|educat|enjoy|excellent|extraordinary|excellent|favorable|future|healthy|inspir|majestic|moderate|mild|mystique|pleasant|popular|quality.*life|relax|sight|special|spectacular|stunning|tours|tourist|tourism|visit|tourist|tourism|visit|treasure|valuable|valuing|well suited|well-suited|wonder…
EEP	Atmosphere	Sunlight	exclude	sunset|sunrise|phenomena|experienced|sunnybank	necropsy|outcrop|sunnybank	sunset|sunrise|phenomena|rural.*atmosphere|changing.*climate|welcoming.*atmosphere|climate.*friendly|cloud.*berry|cloud.*water|water.*cloud|turbid|atmospheric science|NOAA|Atmospheric Administration|deposit|atmospheric fall|sky lupine|theat|train|winter salt marsh|rainwater kill|sundew|suny|fall river|freshwater spring|falls within|staff|summer camp|summer street|summer street|worker|sunken|progr…
EEP	Atmosphere	Sunlight	near	sunlight| sun |solar|sunny|sunshine	sunlight| sun |solar|sunny|sunshine	sunlight| sun |solar|sunny|sunshine
EEP	Atmosphere	Temperature	include	heat|hot|cold|freeze|humid|climate|summer|fall|winter|spring|autumn|season	pleasant	allure|appeal|alluring|amaze|amazing|appreciat|attract|beaut|beneficial|comfort|desired|desirable|destination|educat|enjoy|excellent|extraordinary|excellent|favorable|future|healthy|inspir|majestic|moderate|mild|mystique|pleasant|popular|quality.*life|relax|sight|special|spectacular|stunning|tours|tourist|tourism|visit|tourist|tourism|visit|treasure|valuable|valuing|well suited|well-suited|wonder…
EEP	Atmosphere	Temperature	exclude	climate change|carbon dioxide|helium|nitrogen|hydrogen|changing.*climate|rural.*atmosphere|changing.*climate|welcoming.*atmosphere|climate.*friendly|cloud.*berry|cloud.*water|water.*cloud|turbid|atmospheric science|NOAA|Atmospheric Administration|deposit|atmospheric fall|sky lupine|theat|train|winter salt marsh|rainwater kill|sundew|suny|fall river|freshwater spring|falls within|staff|summer camp…	|temperature-controlled	rural.*atmosphere|changing.*climate|welcoming.*atmosphere|climate.*friendly|cloud.*berry|cloud.*water|water.*cloud|turbid|atmospheric science|NOAA|Atmospheric Administration|deposit|atmospheric fall|sky lupine|theat|train|winter salt marsh|rainwater kill|sundew|suny|fall river|freshwater spring|falls within|staff|summer camp|summer street|summer street|worker|sunken|program|session|employ|wave cl…
EEP	Atmosphere	Temperature	near	temperature	temperature	temperature
EEP	Other Natural Components	Other Natural Components	include	accomodat|amenit|asset|beneficial|benefit|business|buy|collect|commercial|commodities|commodity|goods|corporation|dealer|econom|exploit|extract|income|industry|initiative|job|option value|products|profession|profit|promote|promotion|purpose|resource| sale|save|saving| sell|trade|trading|sustainabl|well suited|well-suited|valuable|value|valuing	accomodat|amenit|asset|beneficial|benefit|business|buy|collect|commercial|commodities|commodity|goods|corporation|dealer|econom|exploit|extract|income|industry|initiative|job|option value|products|profession|profit|promote|promotion|purpose|resource| sale|save|saving| sell|trade|trading|sustainabl|well suited|well-suited|valuable|value|valuing	fill|geotube|bag	recycled material|informational material|educational material|instructional material|organic material|exhibit material|recreate
EEP	Other Natural Components	Other Natural Components	exclude	clay brook|boneset|sand dollar|sand coco|stone lab|fossil fuel|sand barrier|sandflat|sand flat|sand accumulation|sticker|nonstick|capstone|keystone|cornerstone|touchstone|milestone|rocky mountain|gabion|rockcress|rockfish|larock|rock crab|shamrock|rock shrimp|rock cancer|rockport|rockaway|rocky|Rock Cove|rockingham|bedrock|rock fish|rock jasmine|rockport|rockaway|rocky|Rock Cove|sediment|channel|…	clay brook|boneset|sand dollar|sand coco|stone lab|fossil fuel|sand barrier|sandflat|sand flat|sand accumulation|sticker|nonstick|capstone|keystone|cornerstone|touchstone|milestone|rocky mountain|gabion|rockcress|rockfish|larock|rock crab|shamrock|rock shrimp|rock cancer|rockport|rockaway|rocky|Rock Cove|rockingham|bedrock|rock fish|rock jasmine|rockport|rockaway|rocky|Rock Cove|sediment|channel|…	sand flat|sand barrier|sandflat|sand accumulation|popcorn bag|capstone|keystone|cornerstone|touchstone|milestone|rockport|rocky mountain|gabion|rockcress|rockfish|larock|rock crab|shamrock|rock shrimp|rock cancer|rockport|rockaway|rocky|Rock Cove|rockingham|bedrock|rock fish|rock jasmine|rockport|rockaway|rocky|Rock Cove|sediment|channel|hammock|legend|dune|management.*description|report|inventor…	benef|enhance|enhancing|create|creation|creating
EEP	Other Natural Components	Other Natural Components	near	natural.*material|material.*natural|natural.*object|object.*natural|material.*environment|material.*ecosystem|ecosystem.*material|environment.*material|aquatic.*material|material.*aquatic	sand| shell | shells |acorn|stick|clay|rock|fossil|stone|driftwood|gravel	sand|gravel|rock|stone	material.*place|place.*material|material.*dredg|dredg.*material
EEP	Other Natural Components	Fuel Quality	include	quality|replenish|health|suitable|suitability|condition|good|prime	quality|replenish|health|suitable|suitability|condition|good|prime
EEP	Other Natural Components	Fuel Quality	exclude		timber oat|clogging|woody|invasive|nonnative|non.*native|manage|plan|goal|legislat|fish|threat.*watershed|watershed.*threat|threat.*habitat|habitat.*threat|harmful|marine|http|sewage|sanitary|acquatic|plastic|management.*area|runoff|stormwater|dredg|greek|ocean|sea|coast|septic|university|mcbp|landed|landing|landmark|council|forestry.*service|forestablish|shoreline|geologic|forest.*stewardship|la…
EEP	Other Natural Components	Fuel Quality	near	firewood|campfire|fuelwood|fuel resource	driftwood.*fire|wood.*fire|forest.*fire|timber.*fire|logging.*fire|lumber.*fire|driftwood.*fuel|wood.*fuel|forest.*fuel|timber.*fuel|logging.*fuel|lumber.*fuel|fire.*driftwood|fire.*wood|fire.*forest|fire.*timber|fire.*logging|fire.*lumber|fuel.*driftwood|fuel.*wood|fuel.*forest|fuel.*timber|fuel.*logging|fuel.*lumber
EEP	Other Natural Components	Fuel Quantity	include	quantity|provid|service|provision|collect|gather|natur|subsist|use|benefit| product |industr| mill | mills |harvest|bountiful|bounty|commercial|commodities|commodity|goods|option|abundance|volume|asset|resource|restor| sale|save|saving| sell|create|construct|produce	driftwood|wood|forest|timber|logging|lumber
EEP	Other Natural Components	Fuel Quantity	exclude		timber oat|clogging|woody|invasive|nonnative|non.*native|manage|plan|goal|legislat|fish|threat.*watershed|watershed.*threat|threat.*habitat|habitat.*threat|harmful|marine|http|sewage|sanitary|acquatic|plastic|management.*area|runoff|stormwater|dredg|greek|ocean|sea|coast|septic|university|mcbp|landed|landing|landmark|council|forestry.*service|forestablish|shoreline|geologic|forest.*stewardship|la…
EEP	Other Natural Components	Fuel Quantity	near	firewood|campfire|fuelwood|fuel resource	fuel|fire
EEP	Other Natural Components	Fiber Material Quantity	include	quantity|provid|service|provision|collect|gather|natur|subsist|use|benefit| product |industr| mill | mills |harvest|bountiful|bounty|commercial|commodities|commodity|goods|resource|option|abundance|volume|asset|restor| sale|save|saving| sell|create|construct|produce	timber|logging|lumber	subsist| mill | mills |paper|fiber|fibrous|filament|fabric|textile|goods|bedding|mulch|insulation|cloth| rope|thread	subsist| mill | mills |paper|fiber|fibrous|filament|fabric|textile|goods|bedding|mulch|insulation|cloth| rope|thread
EEP	Other Natural Components	Fiber Material Quantity	exclude	fiberglass|issues|journal|national.*park.*service|elderberry|15.*visitor|silvicultur|cause|focused|optic|million|millimeter|millennia|milliliter|millirem|milligram|miller|mill.*creek|mill pond|millet|reproduc|productiv|fiber content|cotton|agency|askin|pickerel|by-product|byproduct|by product|chid|entrap|strap|sediment.*trap|sand.*trap|trap.*sand|trap.*sediment|litter trap|fish trap|especial|powe…	timber oat|clogging|woody|invasive|nonnative|non.*native|manage|plan|goal|legislat|fish|threat.*watershed|watershed.*threat|threat.*habitat|habitat.*threat|harmful|marine|http|sewage|sanitary|acquatic|plastic|management.*area|runoff|stormwater|dredg|greek|ocean|sea|coast|septic|university|mcbp|landed|landing|landmark|council|forestry.*service|forestablish|shoreline|geologic|forest.*stewardship|la…	timber oat|clogging|woody|invasive|nonnative|non.*native|manage|plan|goal|legislat|fish|threat.*watershed|watershed.*threat|threat.*habitat|habitat.*threat|harmful|marine|http|sewage|sanitary|acquatic|plastic|management.*area|runoff|stormwater|dredg|greek|ocean|sea|coast|septic|university|mcbp|landed|landing|landmark|council|forestry.*service|forestablish|shoreline|geologic|forest.*stewardship|la…	grassroot|grass-root|paper mulberry|sea grass|freed|mcreedy|sea-grass|eelgrass|oyster.*grass|seagrass|grassland|sea- grass|decreed|breed|agreed|haynes|hay.*barn|hayden|cottonwood|freed|cottontail|reedgrass|hayan|issues|journal|scotton|invasive|non.*native|nonnative|national.*park.*service|elderberry|15.*visitor|cause|focused|million|millimeter|millennia|milliliter|millirem|milligram|miller|mill.*…
EEP	Other Natural Components	Fiber Material Quantity	near	fiber		driftwood|wood|forest|timber|logging|lumber	salt hay|reed|grass|marsh hay
EEP	Other Natural Components	Fiber Material Quality	include	quality|replenish|health|suitable|suitability|condition|good|prime	quality|suitable|suitability|condition|good|prime
EEP	Other Natural Components	Fiber Material Quality	exclude	fiberglass|issues|journal|national.*park.*service|elderberry|15.*visitor|silvicultur|cause|focused|optic|million|millimeter|millennia|milliliter|millirem|milligram|miller|mill.*creek|mill pond|millet|reproduc|productiv|fiber content|cotton|agency|askin|pickerel|by-product|byproduct|by product|chid|entrap|strap|sediment.*trap|sand.*trap|trap.*sand|trap.*sediment|litter trap|fish trap|especial|powe…	timber oat|clogging|woody|invasive|nonnative|non.*native|manage|plan|goal|legislat|fish|threat.*watershed|watershed.*threat|threat.*habitat|habitat.*threat|harmful|marine|http|sewage|sanitary|acquatic|plastic|management.*area|runoff|stormwater|dredg|greek|ocean|sea|coast|septic|university|mcbp|landed|landing|landmark|council|forestry.*service|forestablish|shoreline|geologic|forest.*stewardship|la…
EEP	Other Natural Components	Fiber Material Quality	near	fiber	timber|logging|lumber
EEP	Other Natural Components	Mineral_Chemical Quantity	include	quantity|provid|service|provision|collect|gather|natur|subsist|use|benefit| product |industr| mill | mills |harvest|bountiful|bounty|commercial|commodities|commodity|goods|option|abundance|volume|asset|resource|restor| sale|save|saving| sell|create|construct|produce	mining|mine|shell mining|quarry	turpentine	mineral resource|mineral deposit|chemical resource|chemical product
EEP	Other Natural Components	Mineral_Chemical Quantity	exclude	toxic|contamina|cycling|chemical analys|chemically|chemical process|chemical properties|agency|askin|pickerel|by-product|byproduct|by product|chid|entrap|strap|sediment.*trap|sand.*trap|trap.*sand|trap.*sediment|litter trap|fish trap|especial|power.*generation|electric.*generation|generation plant|generation facilit|laboratory observ|field observ|lab observ|special issue|meadow beauty|river beaut…	remediat.*min|data.*min|determining|examining|determine|examine|promine|fluminea|omine|minen|mineu|amine|plaquemine|ermin|minello|deter-min|deter- min|minea|post-min|division|smine|reclaim.*min|min.*reclaim|min.*reclam|reclam.*min|under- min|minerals management service|chemical spraying|chemical treatment
EEP	Other Natural Components	Mineral_Chemical Quantity	near	mineral|chemical	mineral|chemical
EEP	Other Natural Components	Mineral_Chemical Quality	include	quality|replenish|health|suitable|suitability|condition|good|prime
EEP	Other Natural Components	Mineral_Chemical Quality	exclude	toxic|contamina|habitat quality|ecological health|cycling|chemical analys|chemically|chemical process|chemical properties|agency|askin|pickerel|by-product|byproduct|by product|chid|entrap|strap|sediment.*trap|sand.*trap|trap.*sand|trap.*sediment|litter trap|fish trap|especial|power.*generation|electric.*generation|generation plant|generation facilit|laboratory observ|field observ|lab observ|speci…
EEP	Other Natural Components	Mineral_Chemical Quality	near	mineral|chemical
EEP	Other Natural Components	Presence of Other Natural Materials for Artistic Use or Consumption	include	ornament|jewel|pottery| art |arts |artisan|artist	essay|contest|artisan|artist| art | arts | activit|allure|appeal|appreciat|attract|alluring|amaze|amazing|ameniable|bequest|bountiful|bounty| care| caring|charisma|cherish|conserv|children|comfort|concern|critical|desired|desirable|destination|diversity|educat|encourag|enhance|enhancing|enjoy|encounter|enthusiast|experienc|extraordinary|excellent|families|family|favorable|favor|feel|festiv|ceremo…	essay|contest|artisan|artist| art | arts | activit|allure|appeal|appreciat|attract|alluring|amaze|amazing|ameniable|bequest|bountiful|bounty| care| caring|charisma|cherish|conserv|children|comfort|concern|critical|desired|desirable|destination|diversity|educat|encourag|enhance|enhancing|enjoy|encounter|enthusiast|experienc|extraordinary|excellent|families|family|favorable|favor|feel|festiv|ceremo…
EEP	Other Natural Components	Presence of Other Natural Materials for Artistic Use or Consumption	exclude	figure15|policies|loss.*value|15.*visitor|highhigh|ornamental.*species|clay brook|boneset|sand dollar|sand coco|stone lab|fossil fuel|sand barrier|sandflat|sand flat|sand accumulation|sticker|nonstick|capstone|keystone|cornerstone|touchstone|milestone|rocky mountain|gabion|rockcress|rockfish|larock|rock crab|shamrock|rock shrimp|rock cancer|rockport|rockaway|rocky|Rock Cove|rockingham|bedrock|roc…	clay brook|boneset|sand dollar|sand coco|stone lab|fossil fuel|sand barrier|sandflat|sand flat|sand accumulation|sticker|nonstick|capstone|keystone|cornerstone|touchstone|milestone|rocky mountain|gabion|rockcress|rockfish|larock|rock crab|shamrock|rock shrimp|rock cancer|rockport|rockaway|rocky|Rock Cove|rockingham|bedrock|rock fish|rock jasmine|rockport|rockaway|rocky|Rock Cove|sediment|channel|…	clay brook|boneset|sand dollar|sand coco|stone lab|fossil fuel|sand barrier|sandflat|sand flat|sand accumulation|sticker|nonstick|capstone|keystone|cornerstone|touchstone|milestone|rocky mountain|gabion|rockcress|rockfish|larock|rock crab|shamrock|rock shrimp|rock cancer|rockport|rockaway|rocky|Rock Cove|rockingham|bedrock|rock fish|rock jasmine|rockport|rockaway|rocky|Rock Cove|sediment|channel|…
EEP	Other Natural Components	Presence of Other Natural Materials for Artistic Use or Consumption	near	natur|organic|environment|ecosystem|salt hay|reed|grass|marsh hay|driftwood|wood|forest|timber|logging|lumber| shell | shells |acorn|stick|clay|rock|fossil|stone|bone|feather| fur |hide|driftwood|sand|gravel|rock|stone	natural.*material|material.*natural|natural.*object|object.*natural|material.*environment|material.*ecosystem|ecosystem.*material|environment.*material|aquatic.*material|material.*aquatic	sand| shell | shells |acorn|stick|clay|rock|fossil|stone|driftwood|gravel
EEP	Composite	Composite	include	accomodat|amenit|asset|beneficial|benefit|business|buy|commercial|commodities|commodity|goods|corporation|dealer|econom|exploit|extract|income|industry|initiative|job|option value|products|profession|profit|promote|promotion|purpose|resource| sale|save|saving| sell|subsist|sustenance|trade|trading|sustainabl|well suited|well-suited|valuable|value|valuing
EEP	Composite	Composite	exclude	landfill|product|goods|environmentally|aerial photograph|digitiz|orthophotograph|bay scallop|agency|askin|pickerel|by-product|byproduct|by product|chid|entrap|strap|sediment.*trap|contam.*trap|pollut.*trap|trap.*contam|trap.*pollut|trap.*nutrient|nutrient.*trap|sand.*trap|trap.*sand|trap.*sediment|litter trap|fish trap|especial|power.*generation|electric.*generation|generation plant|generation fa…
EEP	Composite	Composite	near	natur|environment|ecosystem|estuar|coastal|landscape|shore|grass|green|farmland| hills|wetland
EEP	Composite	Environmental Aesthetics (Sounds & Scents)	include	listen|hear|sensation|sensory|auditory|noise|audible|pleas|aesthetic	environment|ecosystem|natur|flora|flower|plant|berry|berries|estuary|bird.*sing|sing.*bird|song.*bird|bird.*song|croak|chirp|rustl|splash|thunder|song|waves|ocean|natur|cricket|insect|wildlife|environ|bird|wood|forest|grass|comfort|enjoy|pleasant	bird.*sing|sing.*bird|song.*bird|bird.*song|croak|chirp|rustle|rustling|splash|thunder|song|waves|ocean|cricket|insect|wildlife|environ|bird|wood|forest|grass|cicada|katydid|cricket|birds|singing|howl|frog	bird.*sing|sing.*bird|song.*bird|bird.*song|croak|chirp|rustle|rustling|splash|thunder|song|waves|ocean|cricket|insect|cicada|katydid|cricket|birds|wind|singing|howl|frog| toad|noise|sound|audible	bird.*sing|sing.*bird|song.*bird|bird.*song|croak|chirp|rustle|rustling|splash|song|cricket|cicada|katydid|singing|noise|howl	ameliorate|mitigat|concern	rural atmosphere|serene|serenity|owl call|bird call
EEP	Composite	Environmental Aesthetics (Sounds & Scents)	exclude	buffer|listening session|long|manage|management|program|alternative|technology|protocol|habitat|study|measure|debris|involv|crescent|puget.*sound.*action|sound.*practice|disruptive|15.*visitor|glisten|noxious|unpleasant|excessive|unneccesary|hearing|heart|pollut|listening|shear|hear appeal|disruptive|disturb|salem sound|nantucket sound	transplant|polycylic|grassroot|grass-root|aromaticum|aromatic hydrocarbon|buffer|listening session|fluorescent|quiescent|crescent|audubon|15.*visitor|noxious|unpleasant|using|increasing|rising|losing|accessing|dressing|crossing|disposing|promising|passing|proposing|isinglass|licensing|assessing|raising|single|foreclosing|purchasing|collapsing|processing|data|monitor|measur|crucial|glisten|excessi…	grassroot|grass-root|buffer|listening session|fluorescent|quiescent|crescent|audubon|15.*visitor|noxious|unpleasant|using|increasing|rising|losing|accessing|dressing|crossing|disposing|promising|passing|proposing|isinglass|licensing|assessing|raising|single|foreclosing|purchasing|collapsing|processing|data|monitor|measur|crucial|glisten|excessive|unneccesary|hearing|heart|pollut|shear|hear appeal…	the sound|Puget sound|croaker|buffer|listening session|fluorescent|quiescent|crescent|audubon|15.*visitor|noxious|unpleasant|using|increasing|rising|losing|accessing|dressing|crossing|disposing|promising|passing|proposing|isinglass|licensing|assessing|raising|single|foreclosing|purchasing|collapsing|processing|data|monitor|measur|crucial|glisten|excessive|unneccesary|hearing|heart|pollut|shear|he…	croaker|rsing|nsing|ssing|asing|esing|osing|ising|using|ysing|buffer|listening session|fluorescent|quiescent|crescent|audubon|15.*visitor|noxious|unpleasant|using|increasing|rising|losing|accessing|dressing|crossing|disposing|promising|passing|proposing|isinglass|licensing|assessing|raising|single|foreclosing|purchasing|collapsing|processing|data|monitor|measur|crucial|glisten|excessive|unneccesa…	odora|delairea|odore|odoru|odori|odorv|ethofum|theodor
EEP	Composite	Environmental Aesthetics (Sounds & Scents)	near	sound	scent|sensory|olfactory|auditory|smell|listen|noise|aroma|audible|odor|fragrant|fragrance	listen|noise	hear	enjoy|pleasant|watch|observ|audible	odor|smell
EEP	Composite	Environmental Aesthetics (Viewscapes)	include	accomodat|activit|aesthetic|ameniable|amenit|appreciat|artisan|artist| art | arts |asset|attract|beaut|beneficial|benefit|bequest|bountiful|bounty|business|buy| care| caring|charisma|cherish|children|collect|comfort|commercial|commodities|commodity|goods|concern|conserv|corporation|critical|dealer|delicious|desired|desirable|destination|econom|edible|educat|encourag|endangered|enhance|enhancing|e…	natur|environment|ecosystem|estuar|coastal|landscap|ocean|shore|water|forest|woodland|grass|green|farmland| hills|mountain|wetland|creek|river|stream|pond	comfort|desirable|destination|enjoy|favorable|pleasant|popular|relax|special|spectacular|tours|tourist|tourism|treasure|well suited|well-suited|wonder|allure|appeal|alluring|mystique|extraordinary|excellent|amaze|amazing|stunning|majestic|spectacular|scenic|pleasing	natur|environment|ecosystem|estuar|coastal|landscap|ocean|shore|water|forest|woodland|grass|green|farmland| hills|mountain|wetland|creek|river|stream|pond	sunrise|sunset|eclipse|sundown|rainbow|twilight|waterfall|atmospheric phenom	scenic|scenery|horizon|skyline|vantage point|vistas|observation point|observation deck|observation platform|observation area|vista point|scenic vista|natural vista|beauty|beautiful|panorama|panoramic|viewscape|view scape|idyllic	beautification	rolling hill|rolling farmland|rolling landscape
EEP	Composite	Environmental Aesthetics (Viewscapes)	exclude	riverview|viewcontent|views as issues|target view|view.*data|points of view|elevation view|known view|view this document|seek the view|solicit the view|reflect the view|review|bayview|interview|data.*network|aesthetic.*nuisance|aesthetic.*problem|aesthetic.*degradation|vista.*hermosa|vistamar|views.*agency|views.*department|sewage.*collection|aerial.*view.*modif|15.*visitor|treatment|keep.*louisi…	viewcontent|views as issues|target view|view.*data|points of view|elevation view|known view|view this document|seek the view|solicit the view|reflect the view|review|bayview|interview|data.*network|aesthetic.*nuisance|aesthetic.*problem|aesthetic.*degradation|vista.*hermosa|vistamar|views.*agency|views.*department|sewage.*collection|aerial.*view.*modif|15.*visitor|treatment|keep.*louisiana|regula…		flush|plush|ilush|slush|visualize|landfill|product|goods|environmentally|aerial photograph|digitiz|orthophotograph|bay scallop|agency|askin|pickerel|by-product|byproduct|by product|chid|entrap|strap|sediment.*trap|contam.*trap|pollut.*trap|trap.*contam|trap.*pollut|trap.*nutrient|nutrient.*trap|sand.*trap|trap.*sand|trap.*sediment|litter trap|fish trap|especial|power.*generation|electric.*generat…	rodent|staff|presentation|created.*volunteer|15.*visitor|pollution|pollutant|climate|temperature|marina|island|provision|15.*visitor|trout|smelt|sunset of|sunset on|biofog|to sunset|image|imaging|clouded|navigat|sunset of|sunset on|sunset in|sunsets on|sunsets in|infog|turbid|rainbow snake|after sunset|rainbow star|rainbow surf|sunset at|before sunset|sunset cove|sunrise to|rainbow dart|rainbow d…	meadow beauty|river beauty|beautiful jacob|spring beauty|meadowbeauty|meadow-beauty|horizontal|deepwater horizon|may be overlooked|overlook.*concern|beautyberry|Harper.*beauty
EEP	Composite	Environmental Aesthetics (Viewscapes)	near	view|viewscape	view|aesthetically pleasing|viewscape	sight	lush|majestic|aesthetic|visually pleasing
EEP	Composite	Naturalness	include	essay|contest|artisan|artist| art | arts | activit|allure|appeal|appreciat|attract|alluring|amaze|amazing|ameniable|bequest|bountiful|bounty| care| caring|charisma|cherish|conserv|children|comfort|concern|critical|desired|desirable|destination|diversity|educat|encourag|enhance|enhancing|enjoy|encounter|enthusiast|experienc|extraordinary|excellent|families|family|favorable|favor|feel|festiv|ceremo…	hike|hiking|rock climb|bike|biking|bicycl|camping|camper|camps|campground|outing|sightsee|sight-see|picnic|snowmobil|skiing|sledding|ski area|ski resort|snow sport|trail|rec.*hunt|sport.*hunt|hunt.*rec|hunt.*sport|off-road vehicle|nature tour|outdoor program|environmental program|nature photograph|outdoor photog|local photog|outdoor writ|nature writ|environmental writ|waterfront|marina|field trip…	research|scientific|science|scientist
EEP	Composite	Naturalness	exclude	landfill|product|goods|environmentally|aerial photograph|digitiz|orthophotograph|bay scallop|agency|askin|pickerel|by-product|byproduct|by product|chid|entrap|strap|sediment.*trap|contam.*trap|pollut.*trap|trap.*contam|trap.*pollut|trap.*nutrient|nutrient.*trap|sand.*trap|trap.*sand|trap.*sediment|litter trap|fish trap|especial|power.*generation|electric.*generation|generation plant|generation fa…	campaign|suppl|campbell|salmon.*camp|highigh|management.*issue|forsythe|jug.*bay|answers.*question|15.*visitor|steelhead|trailer|traillii|hitchhike|ladder|passage barrier|scenic|view|camp.*dresser|camp.*mckee|zostera|hunt durey|hunting creek|hunting island
EEP	Composite	Naturalness	near	ecosystem|environment|natur|estuar| bay |ecological|outdoor|wilderness|watershed|coast|shore|wetland|parks|region| land |out-of doors		improve.*learn|enhance.*learn|learn.*improve|learn.*enhance|improve.*knowledge|enhance.*knowledge|knowledge.*improve|knowledge.*enhance|permit|opportunit|encourag|accomodat|attract|interest|initiative|promote|reference site|specimen.*collect|sample.*collect|data.*collect|collect.*specimen|collect.*sample|collect.*data|specimen.*gather|sample.*gather|data.*gather|gather.*specimen|gather.*sample|ga…
EEP	Composite	Open Space (Aesthetic)	include	aesthetic|appreciat|heritage|together|enjoy|recreation|commercial|view|beaut|value|inspir|relax|leisure|econom|activit|feel|opportunit|tour|visit|bounty|bountiful|enhance|enhancing	aesthetic|appreciat|heritage|together|enjoy|recreation|commercial|view|beaut|value|inspir|relax|leisure|econom|activit|feel|opportunit|tour|visit|bounty|bountiful|enhance|enhancing	open space|green space|nature preserv|open area|wildland|greenspace|vast expanse
EEP	Composite	Open Space (Aesthetic)	exclude	lose|loss|lost|restrict|federal|govern|manage|stress|preserv|conserv|law|fund|acqui|permit|plan|grant|text|bylaw|municipalit|analy|legislat|map|sprawl|program|conference|steward|goal|action|osrd|decreas|develop|population|division|emission|coliform|highigh|management.*issue|forsythe|jug.*ba|answers.*question|seagrass|program|plan|legislat|division|streetscape|street.*scape|highigh|management.*iss…	developed open space.*palustrine|palustrine.*developed open space|developed open space.*medium intensity developed|medium intensity developed.*developed open space	developed open space.*palustrine|palustrine.*developed open space|developed open space.*medium intensity developed|medium intensity developed.*developed open space
EEP	Composite	Open Space (Aesthetic)	near	open.*space|space.*open|green.*space|space.*green|nature.*preserv|open area|wildland	open space|vast expanse|green space|greenspace
EEP	Composite	Open Space (Land for Development)	include	smart growth|residential develop|commercial develop|sustainable develop|sustainable growth|future develop|new develop|proposed develop|compact develop|convert|filled|drained|ditched|filling|draining|acquisition|acquire|reclaim|reclamation|conversion|suitable for develop|cleared for|urban develop|develop undisturb|develop natural|developing undisturb|developing natural|developed undisturb|develope…	smart growth|residential develop|commercial develop|sustainable develop|sustainable growth|future develop|new develop|proposed develop|compact develop|convert|filled|drained|ditched|filling|draining|acquisition|acquire|reclaim|reclamation|conversion|suitable for develop|cleared for|urban develop|develop undisturb|develop natural|developing undisturb|developing natural|developed undisturb|develope…	sprawl|public land|easement|land trust|disposal.*site|landtrust|material.*disposal|disposal.*material|waste.*dump|dump.*waste|dump.*site|site.*dump	land-loss trend|land develop|develop land|developing land|developed land	unpaved parking|land preserv
EEP	Composite	Open Space (Land for Development)	exclude	upland|landing|landmark|overland|landscap|highland|mainland|england|landing|landmark|cleveland|maryland|portland|cumberland|lander|oakland|stormwater|rainwater|workshop|greenland|gland|system.*land|landbird|landing|landmark|poorly drained|well-drained|drainage basin|drain.*watershed|watershed.*drain|drain.*groundwater|groundwater.*drain|reservoir.*drain|drain.*reservoir	low tide|high tide|tidal|poorly drained|well-drained|drainage basin|drain.*watershed|watershed.*drain|drain.*groundwater|groundwater.*drain|reservoir.*drain|drain.*reservoir|marshal|toms river	frontier|dock|nantasket|issues|contaminat|highhigh|wbwp.*aww|permit.*requirement|application.*conference|15.*visitor
EEP	Composite	Open Space (Land for Development)	near	land |habitat	coast|shore|estuar|marsh| bay |wetland|floodplain|acres|channel|creek|river|waterfront|forest|grassland
EEP	Regulating or Buffering	Regulating or Buffering	include	fixation|sink|replenish|recycle|sequestration|remove|removal|improve|filter|purify|buffer|clean|clear|natural.*process|process.*natural|sequester|natural.*treat|treat.*natural	absorb.*pollut|filter.*pollut|clean.*air|purify.*air|remove.*pollut|reduce.*pollut|reduce.*smog|remove.*smog|corridor|shade|shading|stabiliz|filter.*sediment|improve.*water|clarif|filter.*water|clean.*air|purify.*air|buffer|filter|control|retain|retention|fixation|sink|replenish|recycle|sequestration|sequester|purify|clean|protect	natural.*process|process.*natural|buffer.*erosion|natural.*treat|treat.*natural	bioswale|bio-swale|rain.*garden|bioretention|wind.*break|break.*wind|denitrif|absorb.*pollut|filter.*pollut|purify.*air|remove.*smog|filter.*sediment|filter.*water|purify.*air|natural.*process|process.*natural|natur.*filter|filter.*natur|natur.*filtrat|filtrat.*natur|infiltrate|infiltration|drainfield|sequester carbon|carbon sequest|buffer.*erosion|purify.*water|urban buffer|carbon capture	buffer|mitigat|dampen|absorb
EEP	Regulating or Buffering	Regulating or Buffering	exclude	ciceet|pollut|total.*nitrogen.*loading|tmdl|hydrocarbon|ciceet|pollut|goal|plan|implement|problem|impact|challenge|action|manage|assess|department|water.*quality|agency|inhibit|monitor|load|treatment|data|mandat|develop|act|test|activit|criteria|measur|inform|filter|hydrocarbon|tmdl|regulat|radiocarbon|toxic|algal|algae|hypoxia|eutrophic|septic|pollution|contam|metal|excess|discharge|gas|brown.*t…	transplant|nightshade|marshfield|marshall|braintree|elm street|pine brook|greenbush|bushel|in the process|dash|Wash|eash|lash|mash|rash|uash|cash|delineation|turf|pesticide|fungicide|fertilizer|street|clean water act|clean air act|marshal|coastal protection and restoration authority|toms river|stree|double oak farm|mosquito control|control survey|water fowl	transplant|nightshade|marshfield|marshall|braintree|elm street|pine brook|greenbush|bushel|in the process|dash|Wash|eash|lash|mash|rash|uash|cash|delineation|turf|pesticide|fungicide|fertilizer|street|clean water act|clean air act|marshal|coastal protection and restoration authority|toms river|stree|double oak farm|mosquito control|control survey	restor| drain |train|brain|grain|water fowl
EEP	Regulating or Buffering	Regulating or Buffering	near	nitrogen|carbon| air |atmosphere| water |sediment|erosion|aquatic	tree|forest|vegetat|pine|oak|cypress| elm| ash|maple|hickory|hardwood|canopy|wetland|natural|plants|flora|marsh|green|estuar| land |grass	tree|forest|vegetat|pine|oak|cypress| elm| ash|maple|hickory|hardwood|canopy|wetland|plants|flora|marsh|green|estuar| land |grass		visual|sound|erosion|zone
EEP	Regulating or Buffering	Regulating or Buffering Carbon & Climate	include	fixation|sink|replenish|recycle|sequestration|remove|removal|improve|filter|purify|buffer|clean|clear|natural.*process|process.*natural|sequester|natural.*treat|treat.*natural	absorb.*pollut|filter.*pollut|remove.*pollut|reduce.*pollut|corridor|stabiliz|clarif|buffer|filter|control|retain|retention|fixation|sink|replenish|recycle|sequestration|sequester|purify|clean|natural.*process|process.*natural|natural.*treat|treat.*natural|protect	sequest.*carbon|carbon.*sequest|carbon.*capture|capture.*carbon|blue carbon|carbon.*regulat|regulat.*carbon|climate.*regulat|regulat.*carbon|blue carbon	buffer|mitigat|dampen|absorb
EEP	Regulating or Buffering	Regulating or Buffering Carbon & Climate	exclude	ciceet|pollut|total.*nitrogen.*loading|tmdl|hydrocarbon|ciceet|pollut|goal|plan|implement|problem|impact|challenge|action|manage|assess|department|water.*quality|agency|inhibit|monitor|load|treatment|data|mandat|develop|act|test|activit|criteria|measur|inform|filter|hydrocarbon|tmdl|regulat|radiocarbon|toxic|algal|algae|hypoxia|eutrophic|septic|pollution|contam|metal|excess|discharge|gas|brown.*t…	transplant|nightshade|marshfield|marshall|braintree|elm street|pine brook|greenbush|bushel|in the process|dash|Wash|eash|lash|mash|rash|uash|cash|delineation|turf|pesticide|fungicide|fertilizer|street|clean water act|clean air act|marshal|coastal protection and restoration authority|toms river|stree|control survey
EEP	Regulating or Buffering	Regulating or Buffering Carbon & Climate	near	carbon|climate	carbon|climate		carbon|climate
EEP	Regulating or Buffering	Regulating or Buffering Air	include	fixation|sink|replenish|recycle|sequestration|remove|removal|improve|filter|purify|buffer|clean|clear|natural.*process|process.*natural|sequester|natural.*treat|treat.*natural	clean.*air|purify.*air|reduce.*smog|remove.*smog|shade|shading|clean.*air|purify.*air	wind.*break|break.*wind|purify.*air|remove.*smog|purify.*air	buffer|mitigat|dampen|absorb	absorb.*pollut|filter.*pollut|remove.*pollut|reduce.*pollut|corridor|stabiliz|clarif|buffer|filter|control|retain|retention|fixation|sink|replenish|recycle|sequestration|sequester|purify|clean|natural.*process|process.*natural|natural.*treat|treat.*natural|protect
EEP	Regulating or Buffering	Regulating or Buffering Air	exclude	ciceet|pollut|total.*nitrogen.*loading|tmdl|hydrocarbon|ciceet|pollut|goal|plan|implement|problem|impact|challenge|action|manage|assess|department|water.*quality|agency|inhibit|monitor|load|treatment|data|mandat|develop|act|test|activit|criteria|measur|inform|filter|hydrocarbon|tmdl|regulat|radiocarbon|toxic|algal|algae|hypoxia|eutrophic|septic|pollution|contam|metal|excess|discharge|gas|brown.*t…	transplant|nightshade|marshfield|marshall|braintree|elm street|pine brook|greenbush|bushel|in the process|dash|Wash|eash|lash|mash|rash|uash|cash|delineation|turf|pesticide|fungicide|fertilizer|street|clean water act|clean air act|marshal|coastal protection and restoration authority|toms river|stree|air station|double oak farm	restor| drain |train|brain|grain|air station		transplant|nightshade|marshfield|marshall|braintree|elm street|pine brook|greenbush|bushel|in the process|dash|Wash|eash|lash|mash|rash|uash|cash|delineation|turf|pesticide|fungicide|fertilizer|street|clean water act|clean air act|marshal|coastal protection and restoration authority|toms river|stree|control survey
EEP	Regulating or Buffering	Regulating or Buffering Air	near	air |atmosphere	tree|forest|vegetat|pine|oak|cypress| elm| ash|maple|hickory|hardwood|riparian|canopy|tree|forest|wetland|natural|vegetat|plants|flora|marsh|green|estuar| land |stream|river|grass		visual|sound| air |atmosphere	air |atmosphere
EEP	Regulating or Buffering	Regulating or Buffering Water	include	fixation|sink|replenish|recycle|sequestration|remove|removal|improve|filter|purify|buffer|clean|clear|natural.*process|process.*natural|sequester|natural.*treat|treat.*natural	improve.*water|filter.*water	bioswale|bio-swale|rain.*garden|bioretention|denitrif|filter.*water|infiltrate|infiltration|drainfield|buffer.*erosion|purify.*water	buffer|mitigat|dampen|absorb	absorb.*pollut|filter.*pollut|remove.*pollut|reduce.*pollut|corridor|stabiliz|clarif|buffer|filter|control|retain|retention|fixation|sink|replenish|recycle|sequestration|sequester|purify|clean|natural.*process|process.*natural|natural.*treat|treat.*natural|protect
EEP	Regulating or Buffering	Regulating or Buffering Water	exclude	ciceet|pollut|total.*nitrogen.*loading|tmdl|hydrocarbon|ciceet|pollut|goal|plan|implement|problem|impact|challenge|action|manage|assess|department|water.*quality|agency|inhibit|monitor|load|treatment|data|mandat|develop|act|test|activit|criteria|measur|inform|filter|hydrocarbon|tmdl|regulat|radiocarbon|toxic|algal|algae|hypoxia|eutrophic|septic|pollution|contam|metal|excess|discharge|gas|brown.*t…	transplant|nightshade|marshfield|marshall|braintree|elm street|pine brook|greenbush|bushel|in the process|dash|Wash|eash|lash|mash|rash|uash|cash|delineation|turf|pesticide|fungicide|fertilizer|street|clean water act|clean air act|marshal|coastal protection and restoration authority|toms river|stree|double oak farm|waterfowl|water fowl	restor| drain |train|brain|grain|waterfowl|water fowl	waterfowl|water fowl	transplant|nightshade|marshfield|marshall|braintree|elm street|pine brook|greenbush|bushel|in the process|dash|Wash|eash|lash|mash|rash|uash|cash|delineation|turf|pesticide|fungicide|fertilizer|street|clean water act|clean air act|marshal|coastal protection and restoration authority|toms river|stree|mosquito control|water fowl
EEP	Regulating or Buffering	Regulating or Buffering Water	near	nitrogen|phosphorus|water|contaminant|aquatic	tree|forest|vegetat|pine|oak|cypress| elm| ash|maple|hickory|hardwood|riparian|canopy|tree|forest|wetland|natural|vegetat|plants|flora|marsh|green|estuar| land |stream|river		nitrogen|phosphorus|water|contaminant	nitrogen|phosphorus|water|contaminant
EEP	Regulating or Buffering	Regulating or Buffering Soil & Sediment	include	fixation|sink|replenish|recycle|sequestration|remove|removal|improve|filter|purify|buffer|clean|clear|natural.*process|process.*natural|sequester|natural.*treat|treat.*natural	buffer.*erosion|filter.*sediment	buffer.*erosion|filter.*sediment	buffer|mitigat|dampen|absorb	corridor|stabiliz|clarif|buffer|filter|control|retain|retention|fixation|sink|replenish|recycle|sequestration|sequester|purify|clean|natural.*process|process.*natural|natural.*treat|treat.*natural|protect
EEP	Regulating or Buffering	Regulating or Buffering Soil & Sediment	exclude	ciceet|pollut|total.*nitrogen.*loading|tmdl|hydrocarbon|ciceet|pollut|goal|plan|implement|problem|impact|challenge|action|manage|assess|department|water.*quality|agency|inhibit|monitor|load|treatment|data|mandat|develop|act|test|activit|criteria|measur|inform|filter|hydrocarbon|tmdl|regulat|radiocarbon|toxic|algal|algae|hypoxia|eutrophic|septic|pollution|contam|metal|excess|discharge|gas|brown.*t…	transplant|nightshade|marshfield|marshall|braintree|elm street|pine brook|greenbush|bushel|in the process|dash|Wash|eash|lash|mash|rash|uash|cash|delineation|turf|pesticide|fungicide|fertilizer|street|clean water act|clean air act|marshal|coastal protection and restoration authority|toms river|stree|double oak farm	restor| drain |train|brain|grain		transplant|nightshade|marshfield|marshall|braintree|elm street|pine brook|greenbush|bushel|in the process|dash|Wash|eash|lash|mash|rash|uash|cash|delineation|turf|pesticide|fungicide|fertilizer|street|clean water act|clean air act|marshal|coastal protection and restoration authority|toms river|stree|control survey
EEP	Regulating or Buffering	Regulating or Buffering Soil & Sediment	near	erosion| soil | soils |sediment	tree|forest|vegetat|pine|oak|cypress| elm| ash|maple|hickory|hardwood|riparian|canopy|tree|forest|wetland|natural|vegetat|plants|flora|marsh|green|estuar| land |stream|river		erosion| soil | soils |sediment	erosion| soil | soils |sediment
EEP	Extreme Events	Extreme Events	include	extreme event|natural disaster|natural hazard
EEP	Extreme Events	Extreme Events	exclude	control survey
EEP	Extreme Events	Extreme Events	near	buffer|dampen|absorb|filter|control|protect|retain|retention|attenuat|mitigat|risk|resilien|reduce|reduction
EEP	Extreme Events	Risk of Flooding	include	flood|storm surge|storm-surge|shoreline|coastal|wave|king tide
EEP	Extreme Events	Risk of Flooding	exclude	related.*actions|action.*plan|15.*visitor|applicant|non.*native|flood.*hazard.*control|dredg|mussel|oyster|mollusk|restore|county.*control|control.*district|filter.*strip|bmp|sewage|pollut|discharge|impervious|potential.*prob|potential.*issue|cfda|diking|control survey
EEP	Extreme Events	Risk of Flooding	near	buffer|dampen|absorb|filter|control|protect|retain|retention|attenuat|mitigat|risk|resilien|reduce|reduction
EEP	Extreme Events	Risk of Fire	include	fire |wildfire
EEP	Extreme Events	Risk of Fire	exclude	firewood|related.*actions|action.*plan|15.*visitor|applicant|non.*native|flood.*hazard.*control|dredg|mussel|oyster|mollusk|restore|county.*control|control.*district|filter.*strip|bmp|sewage|pollut|discharge|impervious|potential.*prob|potential.*issue|cfda|diking|police|rescue|fire department|fire protection consultant|firearms|control survey
EEP	Extreme Events	Risk of Fire	near	buffer|dampen|absorb|filter|control|protect|retain|retention|attenuat|mitigat|risk|resilien|reduce|reduction
EEP	Extreme Events	Risk of Extreme Weather Events	include	storm|hurricane|tornado|cyclone|derecho|winds|heat|freez|drought
EEP	Extreme Events	Risk of Extreme Weather Events	exclude	related.*actions|action.*plan|15.*visitor|applicant|non.*native|flood.*hazard.*control|dredg|mussel|oyster|mollusk|restore|county.*control|control.*district|filter.*strip|bmp|sewage|pollut|discharge|impervious|potential.*prob|potential.*issue|cfda|diking|control survey|stormwater
EEP	Extreme Events	Risk of Extreme Weather Events	near	buffer|dampen|absorb|filter|control|protect|retain|retention|attenuat|mitigat|risk|resilien|reduce|reduction
EEP	Extreme Events	Risk of Earthquakes and Landslides	include	earthquake|seismic|tsunami	landslide|mudslide|land-slide|mud-slide
EEP	Extreme Events	Risk of Earthquakes and Landslides	exclude	related.*actions|action.*plan|15.*visitor|applicant|non.*native|flood.*hazard.*control|dredg|mussel|oyster|mollusk|restore|county.*control|control.*district|filter.*strip|bmp|sewage|pollut|discharge|impervious|potential.*prob|potential.*issue|cfda|diking|control survey	related.*actions|action.*plan|15.*visitor|applicant|non.*native|flood.*hazard.*control|dredg|mussel|oyster|mollusk|restore|county.*control|control.*district|filter.*strip|bmp|sewage|pollut|discharge|impervious|potential.*prob|potential.*issue|cfda|diking|control survey
EEP	Extreme Events	Risk of Earthquakes and Landslides	near	buffer|dampen|absorb|filter|control|protect|retain|retention|attenuat|mitigat|risk|resilien|reduce|reduction	buffer|dampen|absorb|filter|control|protect|retain|retention|attenuat|mitigat|risk|resilien
